# Supplementary material
Source: Research Square preprint supplement (doi:10.21203/rs.3.rs-9356848/v1)
Supplement: Supplementary file 1 [file 891baa903ae32a5d0e94eb69.pdf]

1  
2  
3  
4  
5  
6  
7  
8

**Supporting Information for**  
**Interfacial Water Regulation Enables Stable Ampere-Level Nitrate to Ammonia**  
**Conversion**

Xinyue Shi<sup>1†</sup>, Wei-Hsiang Huang<sup>2,3†</sup>, Xingkao Zhang<sup>4†</sup>, Minghui Xie<sup>1†</sup>, Toshinari Koketsu<sup>5,6</sup>, Ping Zhang<sup>1</sup>,  
Yiming Zhu<sup>7</sup>, Xuepeng Zhong<sup>5</sup>, Xiaoyan Zhou<sup>1</sup>, Jun Chen<sup>8</sup>, Min-Hsin Yeh<sup>2,9</sup>, Xiaohua Yu<sup>4\*</sup>, Peter Strasser<sup>5\*</sup>,  
Jiwei Ma<sup>1\*</sup>, Hongfei Cheng<sup>1\*</sup>

## 1 **Methods**

### 2 **Chemical reagents**

3 Nickel sulfate heptahydrate ( $\text{NiSO}_4 \cdot 7\text{H}_2\text{O}$ ,  $\geq 98\%$ ), sodium citrate ( $\text{C}_6\text{H}_5\text{O}_7\text{Na}_3$ ,  $\geq 98\%$ ), salicylic acid  
4 ( $\text{C}_7\text{H}_6\text{O}_3$ ,  $\geq 99.5\%$ ), sodium nitroferricyanide dihydrate ( $\text{Na}_2[\text{Fe}(\text{CN})_5\text{NO}] \cdot 2\text{H}_2\text{O}$ ,  $\geq 99\%$ ), and sodium  
5 hypochlorite aqueous solution ( $\text{NaClO}$ , 6-14%) were supplied by Aladdin. Ferric sulfate ( $\text{Fe}_2(\text{SO}_4)_3$ ,  $> 99\%$ ),  
6 sodium nitrite ( $\text{NaNO}_2$ ,  $\geq 99.99\%$ ), N-(1-naphthyl) ethylenediamine dihydrochloride ( $\text{C}_{12}\text{H}_{16}\text{C}_{12}\text{N}_2$ , 99%),  
7 p-dimethylaminobenzaldehyde ( $\text{C}_9\text{H}_{11}\text{NO}$ , 99%), and maleic acid ( $\text{C}_4\text{H}_4\text{O}_4$ , 99%) were obtained from  
8 Adamas-beta. Aqueous silver nitrate solution ( $\text{AgNO}_3$ , 1 mol  $\text{L}^{-1}$ ) and ammonium chloride aqueous solution  
9 ( $\text{NH}_4\text{Cl}$ , 0.1 g  $\text{L}^{-1}$ ) were purchased from North Weiye Measurement Group Co., Ltd. Potassium nitrate ( $\text{KNO}_3$ ,  
10  $\geq 99\%$ ), phosphoric acid ( $\text{H}_3\text{PO}_4$ , 85%), nitric acid ( $\text{HNO}_3$ , 65-68%), sulfuric acid ( $\text{H}_2\text{SO}_4$ , 95-98%), and  
11 hydrogen peroxide ( $\text{H}_2\text{O}_2$ ,  $\geq 30\%$ ) were procured from Sinopharm Chemical Reagent Co. Ltd (Shanghai,  
12 China). Potassium hydroxide ( $\text{KOH}$ , 85%) and potassium nitrate- $^{15}\text{N}$  ( $\text{K}^{15}\text{NO}_3$ ,  $\geq 99$  at.%  $^{15}\text{N}$ ,  $\geq 99\%$ ) were  
13 obtained from Innochem. Toray Carbon Paper (CP, TGP-H-60) and Nafion 211 membrane were sourced  
14 from the Sci materials hub. Platinum electrode clamp, platinum sheet electrode, graphite rod electrode,  
15 Ag/AgCl (saturated KCl) reference electrode, and Hg/HgO (1 M KOH) reference electrode were supplied  
16 from Tianjin Aida Hengsheng Technology Development Co., Ltd. Membrane electrode assembly device  
17 (MEA) was purchased from Gaosunion Technology Co., Ltd. All reagents were employed as received, with  
18 no additional purification.

19

### 20 **Catalyst preparation**

21 Carbon paper (CP) was employed as the substrate for catalyst fabrication via electrodeposition in a three-  
22 electrode system. The CP was sequentially cleaned by ultrasonication in anhydrous ethanol (30 min), 5 M  
23  $\text{HNO}_3$  (30 min), and deionized water (30 min), followed by drying at 60 °C. For the  $\text{FeO}_x/\text{Ni}$  catalyst,  
24 1.685 g  $\text{NiSO}_4 \cdot 7\text{H}_2\text{O}$  and 2.399 g  $\text{Fe}_2(\text{SO}_4)_3$  were dissolved separately in 30 mL deionized water, and then  
25 3 mL of the  $\text{Fe}_2(\text{SO}_4)_3$  solution was mixed with 27 mL of the  $\text{NiSO}_4 \cdot 7\text{H}_2\text{O}$  solution to prepare the  
26 electrodeposition electrolyte. Electrodeposition was conducted at -1.8 V vs. Ag/AgCl for 600 s under  
27 stirring at 500 rpm, using CP as the working electrode, a carbon rod as the counter electrode, and Ag/AgCl  
28 as the reference electrode. The resulting catalyst was rinsed with anhydrous ethanol and dried under vacuum  
29 at 70 °C. Ni and  $\text{FeO}_x$  catalysts were prepared under similar conditions by using only  $\text{NiSO}_4 \cdot 7\text{H}_2\text{O}$  or  
30  $\text{Fe}_2(\text{SO}_4)_3$  as the electrolyte, with deposition time for  $\text{FeO}_x$  extended to 1 h. For post-synthetic Ag  
31 modification, the  $\text{FeO}_x/\text{Ni}$  catalyst was immersed in 1 mM  $\text{AgNO}_3$  solution for 30 min, rinsed with deionized  
32 water, and dried at 70 °C under vacuum to yield  $\text{FeO}_x/\text{Ni-Ag}$

33

### 34 **Structural analysis**

35  $\text{FeO}_x/\text{Ni}$ ,  $\text{FeO}_x$ , and Ni catalysts were prepared on CP through electrodeposition. The  $\text{FeO}_x/\text{Ni-Ag}$

1 heterostructure was subsequently produced by immersing FeO<sub>x</sub>/Ni in an Ag<sup>+</sup> solution to induce ion exchange.  
2 SEM images show that FeO<sub>x</sub>/Ni maintains a similar morphology before and after ion exchange, exhibiting  
3 dendritic aggregates composed of nanoparticles (Supplementary Fig. 4a–f). FeO<sub>x</sub> forms a relatively smooth  
4 surface coating (Supplementary Fig. 4g), whereas the Ni catalyst consists of sub-100 nm particles assembled  
5 into a branched architecture (Supplementary Fig. 4h,i). TEM analysis reveals that FeO<sub>x</sub>/Ni-Ag contains  
6 abundant interfaces, and the corresponding SAED pattern exhibits diffraction rings characteristic of  
7 crystalline Ni (Supplementary Fig. 5a,b). HRTEM images further indicate that FeO<sub>x</sub>/Ni-Ag comprises  
8 randomly distributed Ni nanocrystallites, Ag nanoparticles, and amorphous FeO<sub>x</sub> domains (Supplementary  
9 Fig. 5c,d). The lattice fringes at the regions marked in Supplementary Fig. 5d correspond to d-spacings of  
10 0.204 nm and 0.236 nm, assigned to the (111) planes of fcc Ni and fcc Ag, respectively (Supplementary Fig.  
11 5e). In addition, the homogeneous distribution of Fe, Ni, and Ag at the sub-micrometer scale confirmed by  
12 TEM energy-dispersive X-ray spectroscopy (EDS) elemental mappings (Supplementary Fig. 5f). The phase  
13 composition and spatial distribution of FeO<sub>x</sub> and Ni domains in FeO<sub>x</sub>/Ni are similar to those in FeO<sub>x</sub>/Ni-Ag  
14 (Supplementary Fig. 6). To resolve the structural states of the individual components, AC-HAADF-STEM  
15 imaging and the corresponding elemental maps reveal an intermixed distribution of amorphous FeO<sub>x</sub> and Ni  
16 nanocrystals, with Ag nanoparticles uniformly decorating the FeO<sub>x</sub>/Ni framework (Fig. 2c – e and  
17 Supplementary Fig. 7). XRD patterns of FeO<sub>x</sub>/Ni-Ag and the control catalysts exhibit the diffraction peaks  
18 of fcc Ni, whereas no FeO<sub>x</sub> peaks are detected due to its low crystallinity. The absence of Ag diffraction  
19 peaks indicates its low loading and nanoscale dispersion, consistent with the microscopy observations  
20 (Supplementary Fig. 8).

21  
22 The electronic structures of FeO<sub>x</sub>/Ni-Ag were probed by XAS and XPS. Fe *K*-edge XANES spectra of the  
23 catalysts and standards (Supplementary Fig. 9a) were used to establish an energy-oxidation state calibration  
24 based on the reference compounds, enabling determination of Fe valence states of 2.73, 2.75, and 2.94 for  
25 FeO<sub>x</sub>/Ni-Ag, FeO<sub>x</sub>/Ni, and FeO<sub>x</sub>, respectively (Supplementary Fig. 9b). Ni *K*-edge XANES analysis yields  
26 corresponding Ni valences of 0.20, 0.20, and 0.04 for FeO<sub>x</sub>/Ni-Ag, FeO<sub>x</sub>/Ni, and the Ni catalyst, respectively  
27 (Supplementary Fig. 9d,e). The Ag *K*-edge XANES of FeO<sub>x</sub>/Ni-Ag exhibits a negative shift relative to Ag  
28 foil (Supplementary Fig. 9g), indicating electron-rich Ag nanoparticles. These results show electron transfer  
29 from Ni to Fe upon formation of the FeO<sub>x</sub>/Ni heterostructure, while the low Ag loading limits its impact on  
30 Fe and Ni valence states. EXAFS analysis further resolves the local coordination. Fe *K*-edge EXAFS  
31 (Supplementary Fig. 9c) shows dominant Fe-O (~1.53 Å) and Fe-Metal (M) (~2.20 Å) coordination for  
32 synthesized catalysts, while the characteristic Fe-Fe scattering at ~2.61 Å in crystalline Fe<sub>2</sub>O<sub>3</sub> is absent,  
33 consistent with disordered FeO<sub>x</sub> domains. Ni *K*-edge EXAFS spectra display only metallic Ni-M  
34 coordination at ~2.17 Å in FeO<sub>x</sub>/Ni-Ag, FeO<sub>x</sub>/Ni, and Ni catalyst (Supplementary Fig. 9f). Variations in the  
35 Fe-M and Ni-M peak intensities relative to the references support the presence of Fe-Ni coordination in

1 FeO<sub>x</sub>/Ni-Ag. The Ag-M peak in the Ag *K*-edge EXAFS of FeO<sub>x</sub>/Ni-Ag appears weakened and shifted to  
2 lower R compared with the Ag-Ag shell in Ag foil, reflecting the formation of shorter Ag-Fe/Ni bonds.  
3 (Supplementary Fig. 9h) WT analyses corroborate oxidized Fe with metallic Ni and Ag in FeO<sub>x</sub>/Ni-Ag  
4 (Supplementary Fig. 10). Surface-sensitive XPS provides complementary evidence. The Fe 2*p*<sub>3/2</sub> peaks of  
5 FeO<sub>x</sub>/Ni shift by -0.3 eV relative to FeO<sub>x</sub> (711.4 eV), consistent with electron shift from Ni to Fe  
6 (Supplementary Fig. 11c). Ni 2*p* spectra of catalysts display both Ni<sup>2+</sup> and Ni<sup>0</sup> features, and the minimal  
7 variations in peak positions are likely dominated by surface oxidation incurred upon air exposure  
8 (Supplementary Fig. 11d). FeO<sub>x</sub>/Ni-Ag shares the same elemental composition as FeO<sub>x</sub>/Ni, except for the  
9 presence of metallic Ag nanoparticles (Supplementary Fig. 11e).

10  
11 The composition of FeO<sub>x</sub>/Ni-Ag was assessed by XPS, SEM-EDS, TEM-EDS, and inductively coupled  
12 plasma optical emission spectroscopy (ICP-OES), yielding Fe:Ni:Ag atomic ratios of 15.04:7.36:3.46,  
13 31.28:17.42:1.25, 20.86:9.93:1.28, and 8.41:24.29:0.20, respectively (Supplementary Fig. 12 and  
14 Supplementary Table 2). The progressive decrease in Ag content with increasing probing depth indicates  
15 surface enrichment of Ag, suggesting enhanced noble-metal utilization. Meanwhile, the Fe:Ni ratio shifts  
16 from ~2:1 in surface-sensitive XPS/EDS to ~1:3 in bulk-sensitive ICP-OES, revealing a Ni-rich interior that  
17 is expected to improve electrical conductivity and facilitates FeO<sub>x</sub> nucleation. Interfacial SEM-EDS  
18 mappings confirm this compositional gradient (Supplementary Fig. 13 a–d). Apart from the absence of Ag,  
19 FeO<sub>x</sub>/Ni shows a comparable elemental distribution (Supplementary Fig. 13e,f).

## 21 **Characterization**

22 SEM images were acquired on a Zeiss GeminiSEM 300 equipped with an Oxford Xplore EDS detector.  
23 TEM, HRTEM, HAADF-STEM, SAED, and EDS mapping were performed on an FEI Tecnai G2 F20 using  
24 copper grids, while aberration-corrected STEM imaging was conducted on a Titan G2 80-200 Chemi STEM  
25 (FEI). XRD patterns were recorded on a Bruker D8 Advance diffractometer (Cu K $\alpha$ , 40 kV, 40 mA). XPS  
26 measurements were carried out on an ESCALAB 250Xi with a monochromatic Al K $\alpha$  source. XAS at the  
27 Fe, Ni, and Ag K-edges was collected at TLS 17A1 and TPS 44A beamline of NSRRC (Taiwan). Elemental  
28 compositions were determined by ICP-OES (Agilent 5110), and NMR spectra were obtained on a Bruker  
29 AV600. Online DEMS was performed with a QAS 100 system, SR-FTIR spectra on a Thermo Fisher Nicolet  
30 6700 spectrometer at BL01B beamline of SSRF (Shanghai), and Raman spectra on a LabRAM HR-Evolution  
31 microscope using a 532 nm laser.

## 33 **Electrochemical measurements**

34 Electrochemical measurements were performed on a Corrtest CS310M workstation in a conventional H-type  
35 cell (50 mL per chamber). The cathode and anode compartments were separated by a Nafion 211 proton

1 exchange membrane. The Nafion 211 membrane ( $2 \times 2 \text{ cm}^2$ ,  $25.4 \text{ }\mu\text{m}$ ) was sequentially treated in 3 wt.%  
2  $\text{H}_2\text{O}_2$ , 1 M  $\text{H}_2\text{SO}_4$ , and deionized water at  $80 \text{ }^\circ\text{C}$  for 1 h, followed by rinsing with deionized water. Catalysts,  
3 an Hg/HgO electrode, and a platinum sheet electrode ( $1 \times 2 \text{ cm}^2$ ) were used as the working, reference, and  
4 counter electrodes, respectively. The geometric area of the working electrode exposed to the electrolyte was  
5  $0.25 \text{ cm}^2$ . The catalyst loading was determined to be  $\sim 8 \text{ mg cm}^{-2}$  by calculating the mass difference before  
6 and after deposition. The catholyte and anolyte consisted of 1 M KOH plus 1 M  $\text{KNO}_3$  and 1 M KOH,  
7 respectively, with a volume of 30 mL each.  $\text{NO}_3\text{RR}$  measurements were performed at a stirring rate of 600  
8 rpm in a  $25 \text{ }^\circ\text{C}$  water bath. All potentials (vs. Hg/HgO) were converted to RHE using the following equation  
9 (1):

$$10 \quad E \text{ (vs. RHE)} = E \text{ (vs. Hg/HgO)} + 0.098 + 0.059 \text{ pH} \quad (1)$$

11 LSV was carried out from 0.3 V to -0.7 V (vs. RHE) at a scan rate of  $10 \text{ mV s}^{-1}$ . Prior to LSV, the catalysts  
12 were conditioned potentiostatically at -0.5 V (vs. RHE) until a stable response was obtained.  
13 Chronoamperometry was performed at a constant potential for 1 h to quantify the reaction products.  
14 Following  $\text{NO}_3\text{RR}$ , the electrolyte was immediately stored at  $2\text{-}6 \text{ }^\circ\text{C}$  to ensure that product analysis was  
15 completed within 72 h. For stability tests, the 45 mL electrolyte was refreshed every 12 h, and a 1 M HCl  
16 solution was used to capture volatilized  $\text{NH}_3$ . The electrochemical double-layer capacitance ( $C_{dl}$ ) was  
17 determined by cyclic voltammetry (CV) at scan rates of 20, 40, 60, 80, and  $100 \text{ mV s}^{-1}$  within the non-  
18 Faradaic potential region. The ECSA was calculated using equation (2):

$$19 \quad \text{ECSA} = \frac{C_{dl}}{C_s} \quad (2)$$

20 Where a  $C_s$  of  $40 \text{ }\mu\text{F cm}^{-2}$  was employed. EIS was conducted over a frequency range of  $0.1\text{-}10^4 \text{ Hz}$ . HER  
21 and OER measurements were conducted using procedures analogous to those for  $\text{NO}_3\text{RR}$ , with 1 M KOH  
22 as the electrolyte and different applied potentials.

23

24 All reported data, including standard deviations, were derived from three independent experiments.

25

## 26 **Calculation of the FE and yield rate**

27 The FE was calculated using the following equation (3):

$$28 \quad \text{FE} = \frac{n \times c \times V \times F}{Q} \times 100 \text{ (\%)} \quad (3)$$

29 Where  $n$  denotes the number of electrons transferred in the reaction (8 for  $\text{NO}_3^- \rightarrow \text{NH}_3$  and 2 for  $\text{NO}_3^- \rightarrow$   
30  $\text{NO}_2^-$ ),  $F$  is the Faraday constant ( $96,485 \text{ C mol}^{-1}$ ),  $c$  ( $\text{mol L}^{-1}$ ) is the product concentration,  $V$  (L) is the  
31 electrolyte volume, and  $Q$  (C) is the total charge passed during electrolysis.

32

1 The yield rate was determined according to the following equation (4):

$$2 \quad Y = \frac{c \times V \times M}{t \times s} \text{ (mg h}^{-1} \text{ cm}^{-2}\text{)} \quad (4)$$

3 Where  $c$  (mol L<sup>-1</sup>) is the product concentration,  $V$  (L) is the electrolyte volume,  $M$  (g mol<sup>-1</sup>) is the molar mass  
4 of the product,  $t$  (h) is the electrolysis time, and  $s$  (cm<sup>2</sup>) is the geometric area of the electrode.

5

### 6 **Colorimetric quantification of NH<sub>3</sub>**

7 The indophenol blue method was used to quantify NH<sub>3</sub> concentrations. Three aqueous solutions were  
8 prepared as follows: (a) 1 M KOH containing 5 wt% sodium citrate and 5 wt% salicylic acid, (b) 0.05 M  
9 NaClO, and (c) 1 wt% sodium nitroferricyanide. A defined volume of electrolyte was diluted to 2 mL with  
10 deionized water, followed by the addition of 2 mL of solution (a), 1 mL of solution (b), and 0.2 mL of solution  
11 (c). The mixture was maintained at room temperature (25 °C) for 2 h and analyzed by UV-vis spectroscopy.  
12 NH<sub>3</sub> concentrations were determined from the absorbance at ~655 nm, with a calibration curve constructed  
13 using standard NH<sub>4</sub>Cl solutions.

14

### 15 **Determination of NH<sub>3</sub> by NMR**

16 Quantitative <sup>1</sup>H NMR (600 MHz) analysis of NH<sub>3</sub> was carried out in DMSO-d<sub>6</sub> with maleic acid as the  
17 internal standard. Calibration curves were constructed from standard mixtures containing NH<sub>4</sub>Cl solution  
18 (0.5 mL), 20 mM maleic acid (0.5 mL), 0.8 M H<sub>2</sub>SO<sub>4</sub> (0.5 mL), and deionized water (0.2 mL); 0.5 mL of  
19 each mixture was diluted with 0.5 mL DMSO-d<sub>6</sub> for measurement. The integrated peak-area ratio of NH<sub>4</sub><sup>+</sup>  
20 to maleic acid was used for quantification. For NO<sub>3</sub>RR tests, electrolysis was performed at -0.4 V in 1 M  
21 KNO<sub>3</sub> + 1 M KOH for 1 h. A volume of 0.5 mL of the electrolyte was mixed with the reagents described  
22 above and analyzed by NMR to determine the NH<sub>4</sub><sup>+</sup> concentration.

23

24 <sup>15</sup>N isotope-labeling experiments were conducted to trace NH<sub>3</sub> formation during NO<sub>3</sub>RR, with <sup>14</sup>NH<sub>4</sub><sup>+</sup> and  
25 <sup>15</sup>NH<sub>4</sub><sup>+</sup> quantified by <sup>1</sup>H NMR (600 MHz); K<sup>14</sup>NO<sub>3</sub> and K<sup>15</sup>NO<sub>3</sub> were used as nitrogen sources, and test  
26 solutions were prepared as for NH<sub>3</sub> calibration but with 0.1 M NO<sub>3</sub><sup>-</sup> in the electrolyte.

27

### 28 **Colorimetric calibration of NO<sub>2</sub><sup>-</sup>**

29 NO<sub>2</sub><sup>-</sup> concentrations were measured via the Griess method. The chromogenic reagent, prepared by dissolving  
30 0.4 g p-dimethylaminobenzaldehyde and 0.02 g N-(1-naphthyl) ethylenediamine dihydrochloride in 5 mL  
31 ultrapure water and 1 mL phosphoric acid (ρ = 1.70 g mL<sup>-1</sup>), was added (0.1 mL) to 5 mL of diluted  
32 electrolyte. After 20 min, UV-vis absorbance was recorded, and NO<sub>2</sub><sup>-</sup> concentrations were determined at  
33 ~540 nm using a NO<sub>2</sub><sup>-</sup> calibration curve. NaNO<sub>2</sub> powder was pre-dried in a vacuum oven at 90 °C for 8 h  
34 before preparing standard NO<sub>2</sub><sup>-</sup> solutions.

35

## 1 **Electrochemical *In-situ* Raman spectroscopy**

2 *In-situ* Raman spectroscopy was performed in a custom three-electrode electrolytic cell. (Supplementary Fig  
3 41a) Prior to reaction, an initial Raman spectrum was collected to characterize the pristine state of the  
4 catalysts. The catalyst was then activated to a stable state via CV. *In-situ* measurements were conducted  
5 under chronoamperometry once the current stabilized, over a potential range of 0.2 to -0.5 V (vs. RHE) with  
6 100 mV intervals.

## 8 ***Operando* XAS measurements**

9 *Operando* XAS at the Fe, Ni, and Ag K-edges was performed at the Taiwan Photon Source (TPS) 44A quick-  
10 scanning beamline using a custom *operando* XAS setup. (Supplementary Fig 39b) An initial spectrum was  
11 collected after the setup assembly. The catalyst was then activated to a stable state at -0.3 V (vs. RHE).  
12 Subsequent *operando* measurements were conducted using chronoamperometry over 0.2 to -0.5 V (vs. RHE)  
13 with 100 mV intervals. XAS spectra were recorded once the current reached a stable value at applied  
14 potentials. (Supplementary Fig. 41b)

## 16 **Electrochemical *In-situ* SR-FTIR Measurements**

17 *In-situ* SR-FTIR measurements were carried out in an electrolytic cell using 1 M KOH plus 1 M KNO<sub>3</sub> as  
18 the electrolyte under potentiostatic control for the synthesized catalysts at the BL01B beamline of SSRF.  
19 (Supplementary Fig 39c) Spectra were recorded from 0.2 V to -0.5V (vs. RHE) at 100 mV intervals. A  
20 background spectrum collected at 0.4 V vs. RHE was used to normalize all subsequent spectra. The catalyst  
21 was first activated to a stable state via CV before performing *in-situ* SR-FTIR measurements.  
22 (Supplementary Fig. 41c)

## 24 **Online DEMS Analysis**

25 Online DEMS measurements were performed using a mass spectrometer coupled with an electrochemical  
26 workstation (Linglu QAS100). FeO<sub>x</sub>/Ni-Ag served as the working electrode, a platinum wire as the counter  
27 electrode, and Ag/AgCl as the reference electrode. The electrolyte consisted of 1.0 M KOH with 1 M KNO<sub>3</sub>.  
28 LSV was carried out from 0.2 to -0.5 V (vs. RHE), and mass signals were recorded during a single scan.

## 30 **MEA Performance Testing**

31 A two-electrode system was assembled using nickel foam (1 cm<sup>2</sup>, 0.5 mm) coated with FeO<sub>x</sub>/Ni-Ag as both  
32 cathode and anode. The anion-exchange membrane (AM01-110, 2 × 2 cm<sup>2</sup>, 110 μm, KMem) was pretreated  
33 by immersion in a 1 M KOH + 1 M KNO<sub>3</sub> solution for 12 h. Both catholyte and anolyte comprised 1 M  
34 KOH with 1 M KNO<sub>3</sub> and were circulated through the chambers using a peristaltic pump (Kamoer KXP100-  
35 GB) at 20 mL min<sup>-1</sup>. To minimize the effects of KNO<sub>3</sub> depletion and electrolyte pH changes on device

1 performance, the electrolytes were replaced regularly. A 1 M HCl solution was used to capture potentially  
2 volatilized NH<sub>3</sub> and prevent its loss. All measurements were performed at 25 °C. (Supplementary Fig. 41d)

## 4 **Computational methods**

### 5 **DFT Calculations**

6 All first-principles calculations were conducted using spin-polarized density functional theory (DFT) within  
7 the Vienna Ab initio Simulation Package (VASP)<sup>1,2</sup>. The projector augmented wave (PAW) pseudopotentials  
8 were utilized in conjunction with the Perdew-Burke-Ernzerhof (PBE) functional under the generalized  
9 gradient approximation (GGA)<sup>3-6</sup>. The convergence thresholds for energy and atomic forces were fixed at  
10 10<sup>-5</sup> eV and 0.01 eV Å<sup>-1</sup>, respectively. For the decoupling of interlayer interactions under periodic boundary  
11 conditions, a vacuum layer of 20 Å was inserted perpendicular to the layers. Following comprehensive  
12 energy convergence tests, a plane-wave cutoff energy of 500 eV was chosen, and Brillouin zone sampling  
13 was performed using a 4 × 1 × 1 Monkhorst-Pack k-point mesh<sup>7</sup>. In order to account for van der Waals (vdW)  
14 interactions between reaction intermediates and catalysts, the DFT-D3 method within the Grimme scheme  
15 was included<sup>8</sup>. Furthermore, a polarizable implicit solvent model was implemented via the VASPsol module,  
16 with the dielectric constant set to 78.4 to simulate an aqueous environment<sup>9</sup>. The charge transfer between  
17 the substrate and the adsorbates was quantified using Bader charge analysis<sup>10,11</sup>. Meanwhile, the crystal  
18 orbital Hamilton populations (COHP) were derived from the DFT wavefunctions using LOBSTER<sup>12,13</sup>.  
19 Finally, to directly evaluate the thermodynamic stability of the catalyst structure, ab initio molecular  
20 dynamics (AIMD) simulations, including constraint-preserving AIMD (cp-AIMD), were performed<sup>14,15</sup>.  
21 These simulations employed a slow-growth methodology within the canonical (NVT) ensemble, utilizing a  
22 Nosé-Hoover thermostat maintained at 300 K.

### 24 **The Gibbs free energy changes (ΔG) calculation**

25 Following the chemical framework of Nørskov et al.<sup>16</sup>, the Gibbs free energy is systematically evaluated  
26 using the computational methods detailed below. The reaction pathway in alkaline media comprises the  
27 following elementary steps<sup>17</sup>:

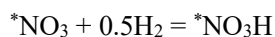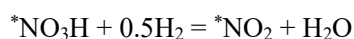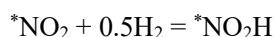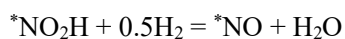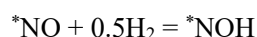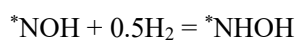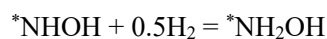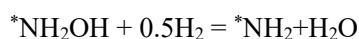

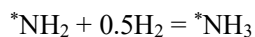

where \* denotes an adsorption site. The Gibbs free energy change ( $\Delta G$ ) of the multistep  $\text{NO}_3\text{RR}$  process is calculated as:

$$\Delta G = \Delta E + \Delta ZPE - T\Delta S + \Delta GU + \Delta G_{\text{pH}} \quad (5)$$

where  $\Delta E$  is the electronic energy difference from DFT calculations,  $\Delta ZPE$  is the zero-point energy correction,  $T$  is the temperature (298.15 K), and  $\Delta S$  is the entropy change. The contribution from the applied electrode potential  $U$  is given by  $\Delta GU = -eU$ . For the calculation, the pH-dependent term is  $\Delta G_{\text{pH}} = k_B T \ln(10) \times \text{pH}$ , where  $k_B$  is the Boltzmann constant and the pH is set to 14.

### Machine learning prediction

To identify the optimal structural configuration, we developed a machine learning pipeline that integrates data collection, feature engineering, model training, and validation. This approach deciphered the structure-property relationships between the catalytic performance and key computational descriptors of the reaction sites, with correlation analysis further quantified using Pearson coefficients<sup>18</sup>. All modeling was implemented using the Scikit-learn library in Python 3<sup>19</sup>, with the complete dataset and preprocessing details provided in the Supporting Information. Here, we employed six machine learning algorithms for regression: Gradient-Boosting regression (GBR)<sup>20</sup>, Random Forest (RF)<sup>21</sup>, K-Nearest Neighbors (KNN)<sup>22</sup>, Multilayer Perceptron (MLP)<sup>23</sup>, Decision Tree (DT)<sup>24</sup>. The performance of these models is evaluated primarily through the widely accepted regression metrics  $R^2$  (coefficient of determination), and RMSE (root mean square error).

$$R^2 = 1 - \frac{\sum_i (y_i - \hat{y}_i)^2}{\sum_i (y_i - \bar{y})^2} \quad (6)$$

$$RMSE = \sqrt{\frac{1}{n} \sum_{i=1}^n (y_i - \hat{y}_i)^2} \quad (7)$$

where  $y_i$  corresponds to the DFT-calculated result,  $\hat{y}_i$  signifies the value predicted by the machine learning model,  $\bar{y}$  denotes the mean of all DFT values, and  $n$  indicates the number of observations considered. A robust regression performance is characterized by error metrics, such as RMSE, approaching zero and an  $R^2$  value close to unity.

### SISSO

The propensity of various noble metals to facilitate the formation of interfacial aqueous layers characterized by a strong hydrogen-bond network was investigated using the SISSO (Sure Independence Screening and Sparsifying Operator) method for descriptor identification<sup>25,26</sup>. The SISSO method, a machine learning technique with excellent screening capability in high-dimensional feature spaces, enables the effective extraction of key factors influencing material properties (e.g., catalytic activity) from complex data, thereby drastically reducing traditional trial-and-error costs while operating synergistically with the complementary machine learning approaches used in this work.

1

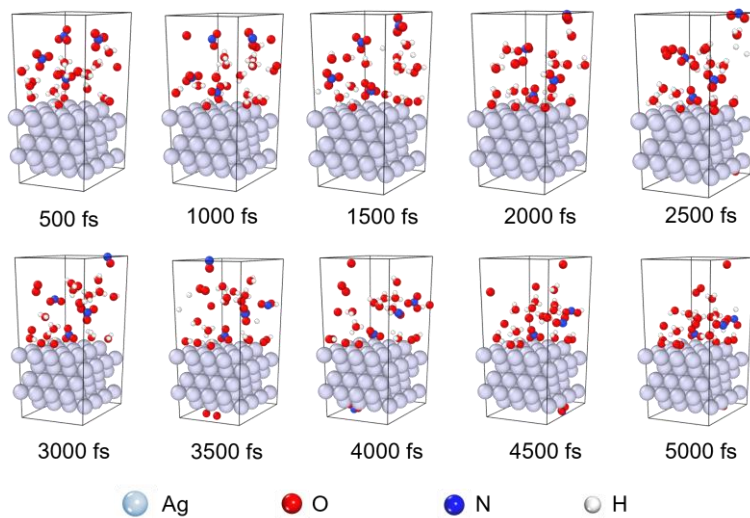

2

3 Supplementary Fig. 1 Evolution of H<sub>2</sub>O and NO<sub>3</sub><sup>-</sup> adsorption configurations on Ag nanoparticles as a  
4 function of time.

5

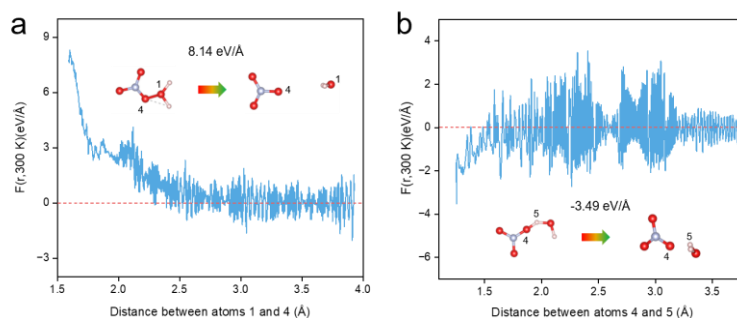

6

7 Supplementary Fig. 2 Ab initio molecular dynamics (AIMD) models of H<sub>2</sub>O and NO<sub>3</sub><sup>-</sup> adsorption on Ag  
8 nanoparticles at 5,000 fs, showing (a) O(NO<sub>3</sub><sup>-</sup>)-O(H<sub>2</sub>O) and (b) O(NO<sub>3</sub><sup>-</sup>)-H(H<sub>2</sub>O) interaction forces.

9

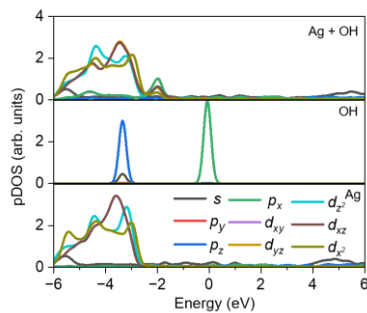

10

11 Supplementary Fig. 3 The pDOS of OH adsorbed on the Ag nanoparticle surface.

12

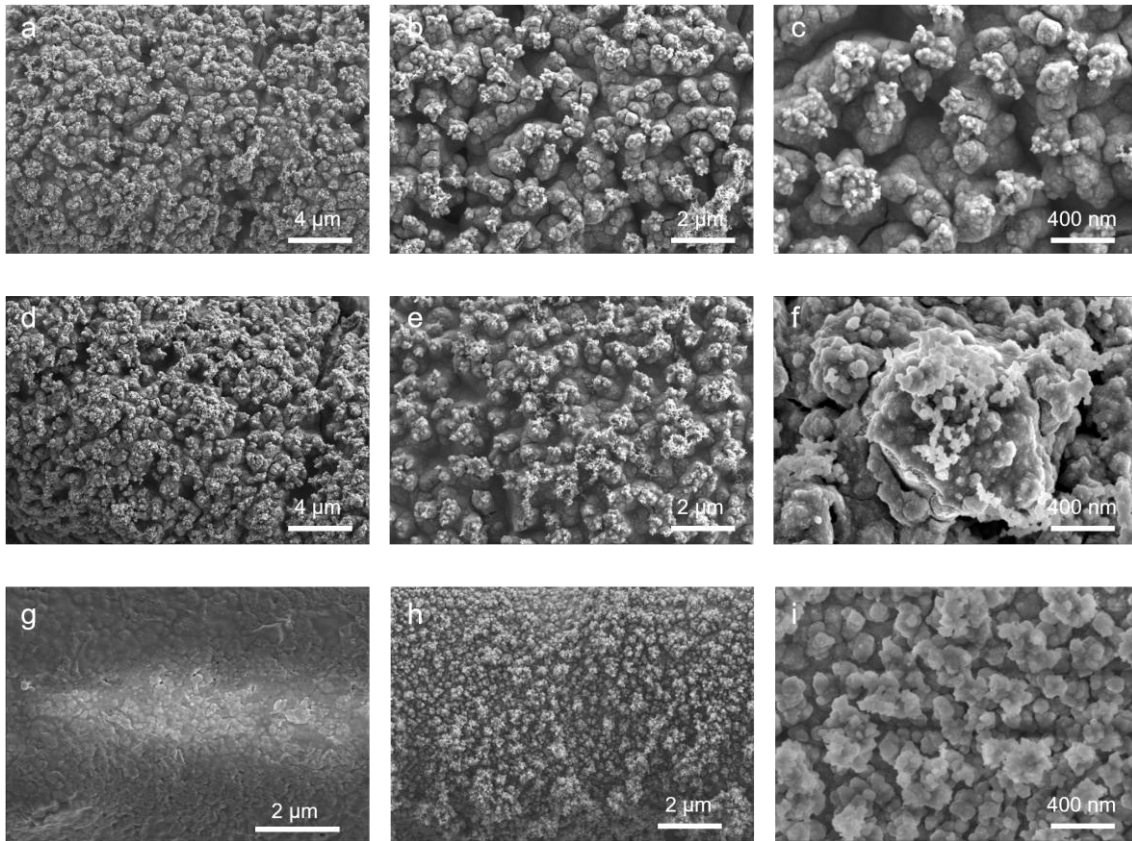

1  
2 Supplementary Fig. 4 SEM images of (a-c) FeO<sub>x</sub>/Ni-Ag, (d-f) FeO<sub>x</sub>/Ni, (g) FeO<sub>x</sub>, and (h,i) Ni catalysts.  
3

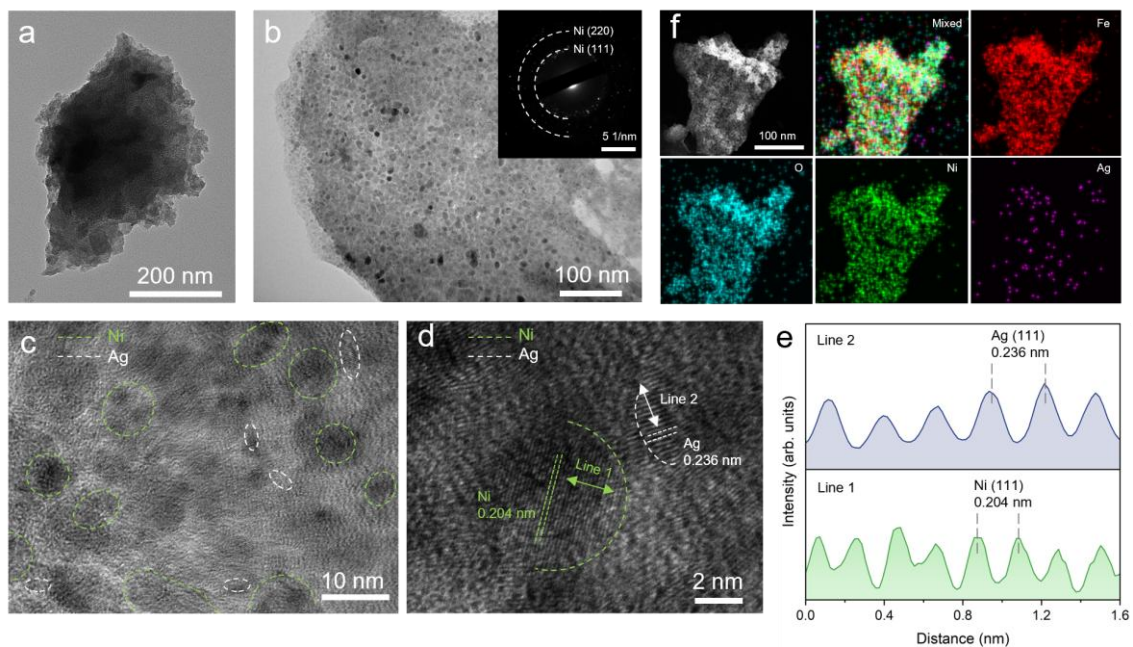

4  
5 Supplementary Fig. 5 (a,b) TEM images of FeO<sub>x</sub>/Ni-Ag, where the inset in (b) showing the corresponding  
6 SAED pattern. (c,d) HRTEM images of FeO<sub>x</sub>/Ni-Ag. (e) Line profiles extracted from the regions indicated  
7 by arrows in (d), revealing the corresponding interplanar spacings. (f) TEM-EDS elemental mapping of  
8 FeO<sub>x</sub>/Ni-Ag.

1

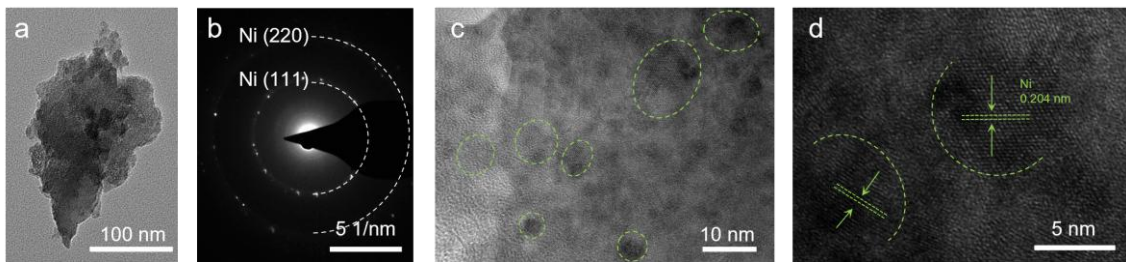

2

3

Supplementary Fig. 6 (a) TEM image, (b) SAED pattern, and (c,d) HRTEM images of FeO<sub>x</sub>/Ni.

4

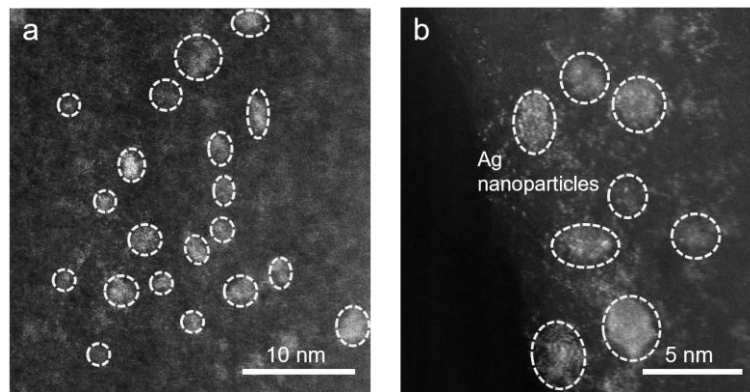

5

6

Supplementary Fig. 7 AC-HAADF-STEM images of FeO<sub>x</sub>/Ni-Ag.

7

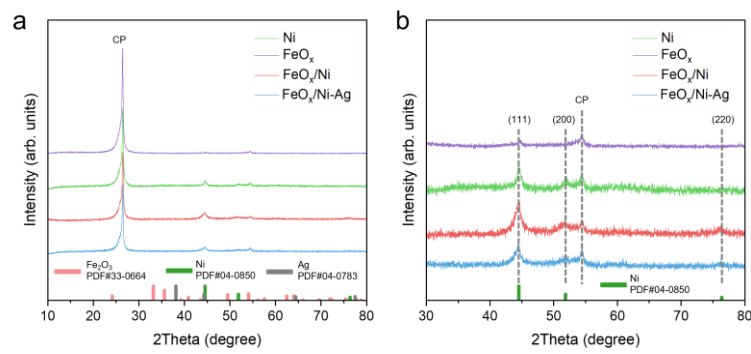

8

9

Supplementary Fig. 8 (a) XRD patterns of the FeO<sub>x</sub>/Ni-Ag, FeO<sub>x</sub>/Ni, FeO<sub>x</sub>, and Ni catalysts. (b) Enlarged

10

view of the XRD patterns.

11

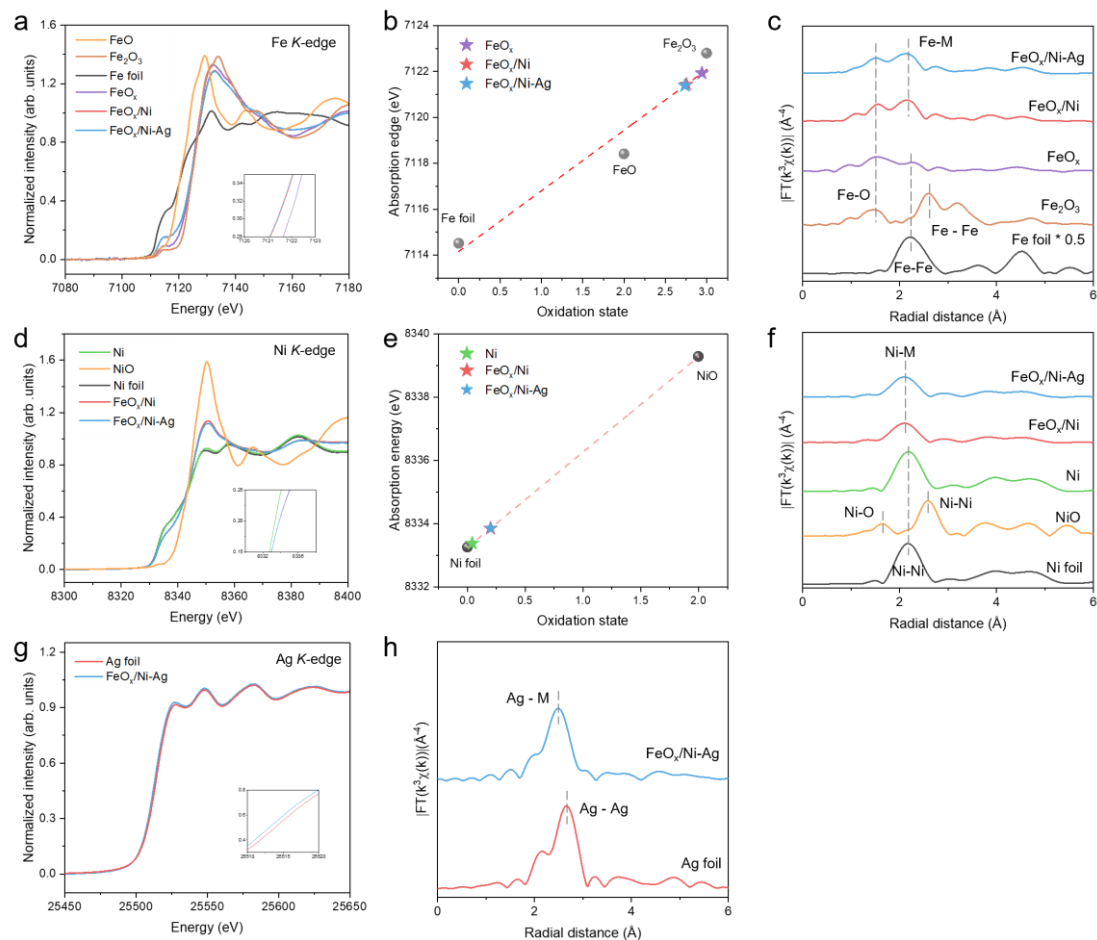

1  
 2 Supplementary Fig. 9 (a) Fe *K*-edge XANES spectra, (b) corresponding oxidation-state comparison derived  
 3 from XANES fitting, and (c) Fe *K*-edge EXAFS spectra of the catalysts and reference samples. (d) Ni *K*-  
 4 edge XANES spectra, (e) corresponding oxidation-state comparison derived from XANES fitting, and (f) Ni  
 5 *K*-edge EXAFS spectra of the synthesized catalysts and Ni reference samples. (g) Ag *K*-edge XANES spectra,  
 6 and (h) EXAFS spectra of FeO<sub>x</sub>/Ni-Ag in comparison with Ag foil.

7

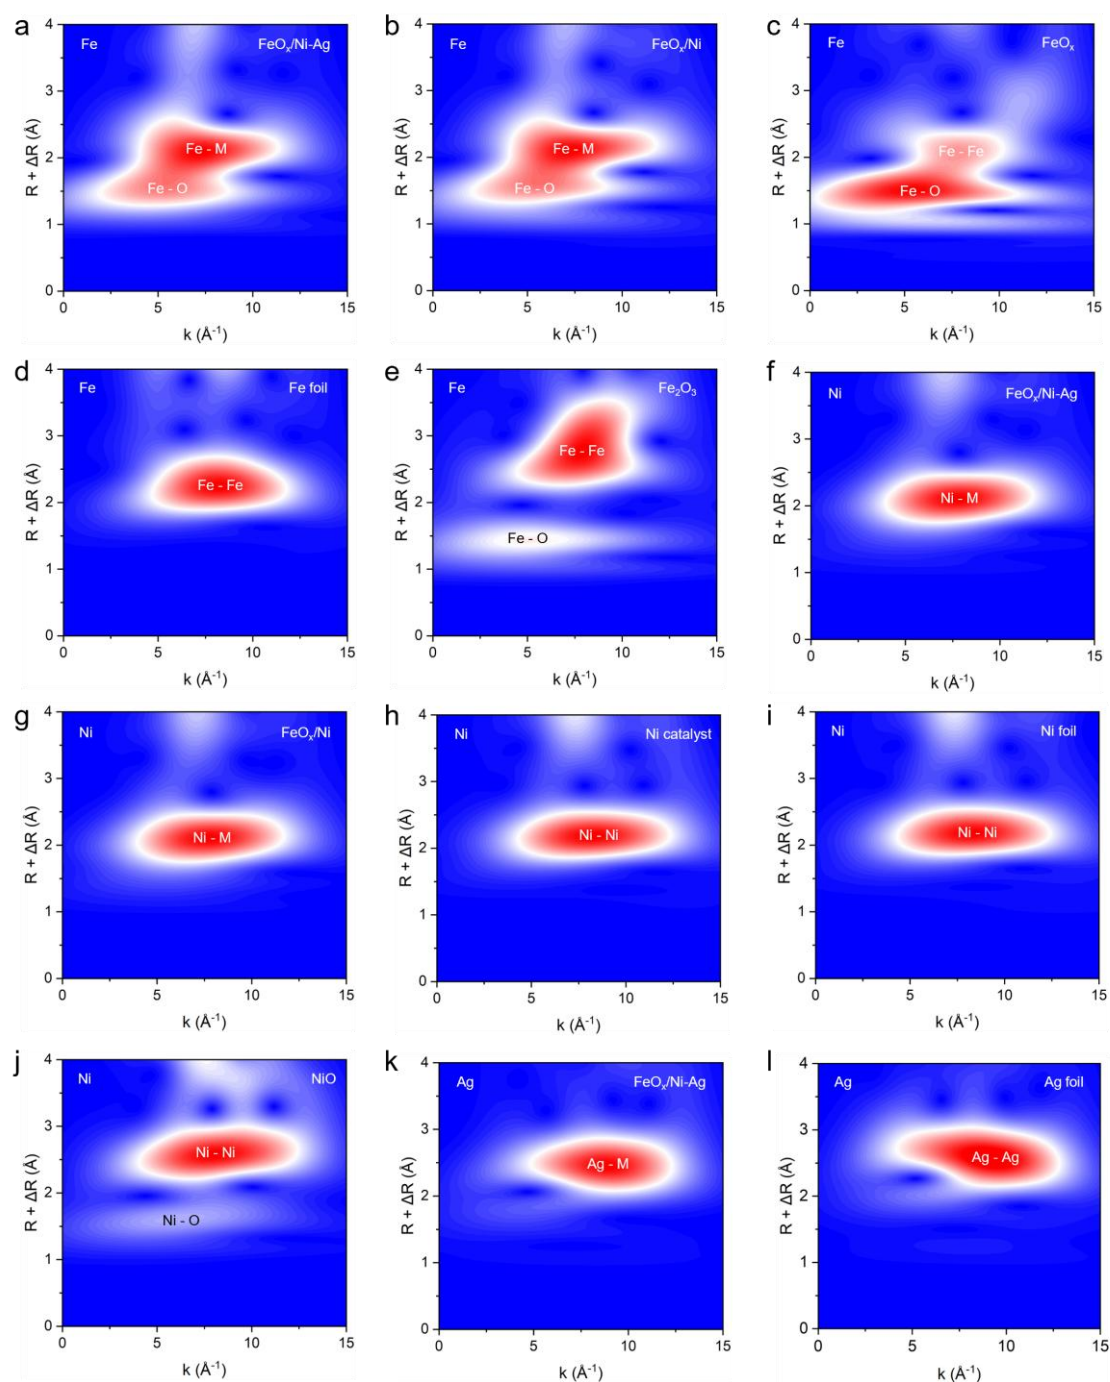

1  
 2 Supplementary Fig. 10  $k^3$ -weighted EXAFS WT maps at the Fe, Ni, and Ag  $K$ -edges. (a-e) Fe  $K$ -edge WT  
 3 plots for FeO<sub>x</sub>/Ni-Ag, FeO<sub>x</sub>/Ni, and FeO<sub>x</sub> catalysts, as well as Fe foil and Fe<sub>2</sub>O<sub>3</sub> references. (f-j) Ni  $K$ -edge  
 4 WT plots for FeO<sub>x</sub>/Ni-Ag, FeO<sub>x</sub>/Ni, and Ni catalysts, as well as Ni foil and NiO references (i,j). (k,l) Ag  $K$ -  
 5 edge WT plot for FeO<sub>x</sub>/Ni-Ag catalyst, and Ag foil reference.

6

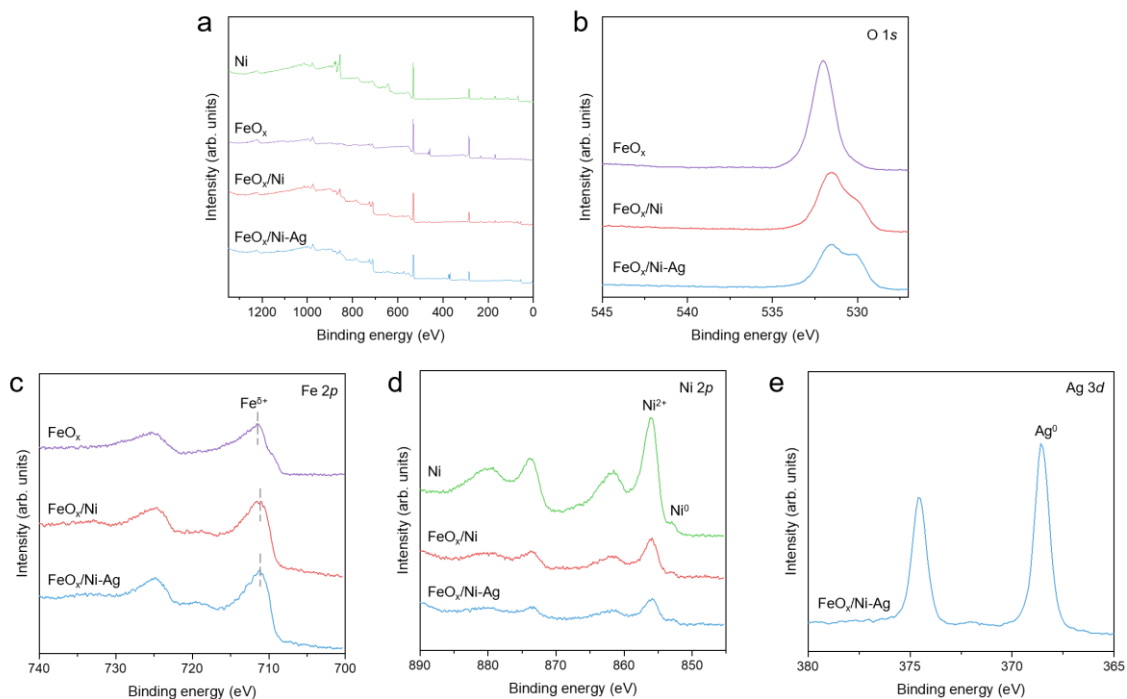

1  
2  
3  
4  
5

Supplementary Fig. 11 XPS characterization of the catalysts. (a) Survey spectra. High-resolution spectra of (b) O 1s and (c) Fe 2p for FeO<sub>x</sub>/Ni-Ag, FeO<sub>x</sub>/Ni, and FeO<sub>x</sub>. (d) High-resolution spectra of Ni 2p for FeO<sub>x</sub>/Ni-Ag, FeO<sub>x</sub>/Ni, and Ni catalysts. (e) High-resolution Ag 3d spectrum for FeO<sub>x</sub>/Ni-Ag.

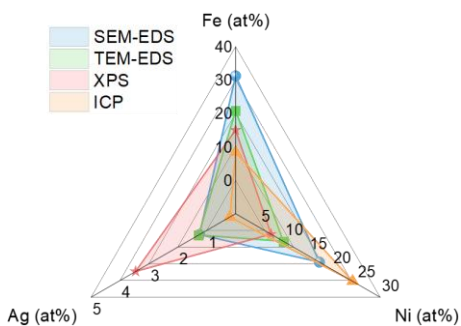

6  
7  
8  
9  
10

Supplementary Fig. 12 Atomic composition of FeO<sub>x</sub>/Ni-Ag determined by SEM-EDS (corresponding to Supplementary Fig. 12a), TEM-EDS (Supplementary Fig. 5f), XPS (Supplementary Fig. 10), and ICP-OES analysis (Supplementary Table 2).

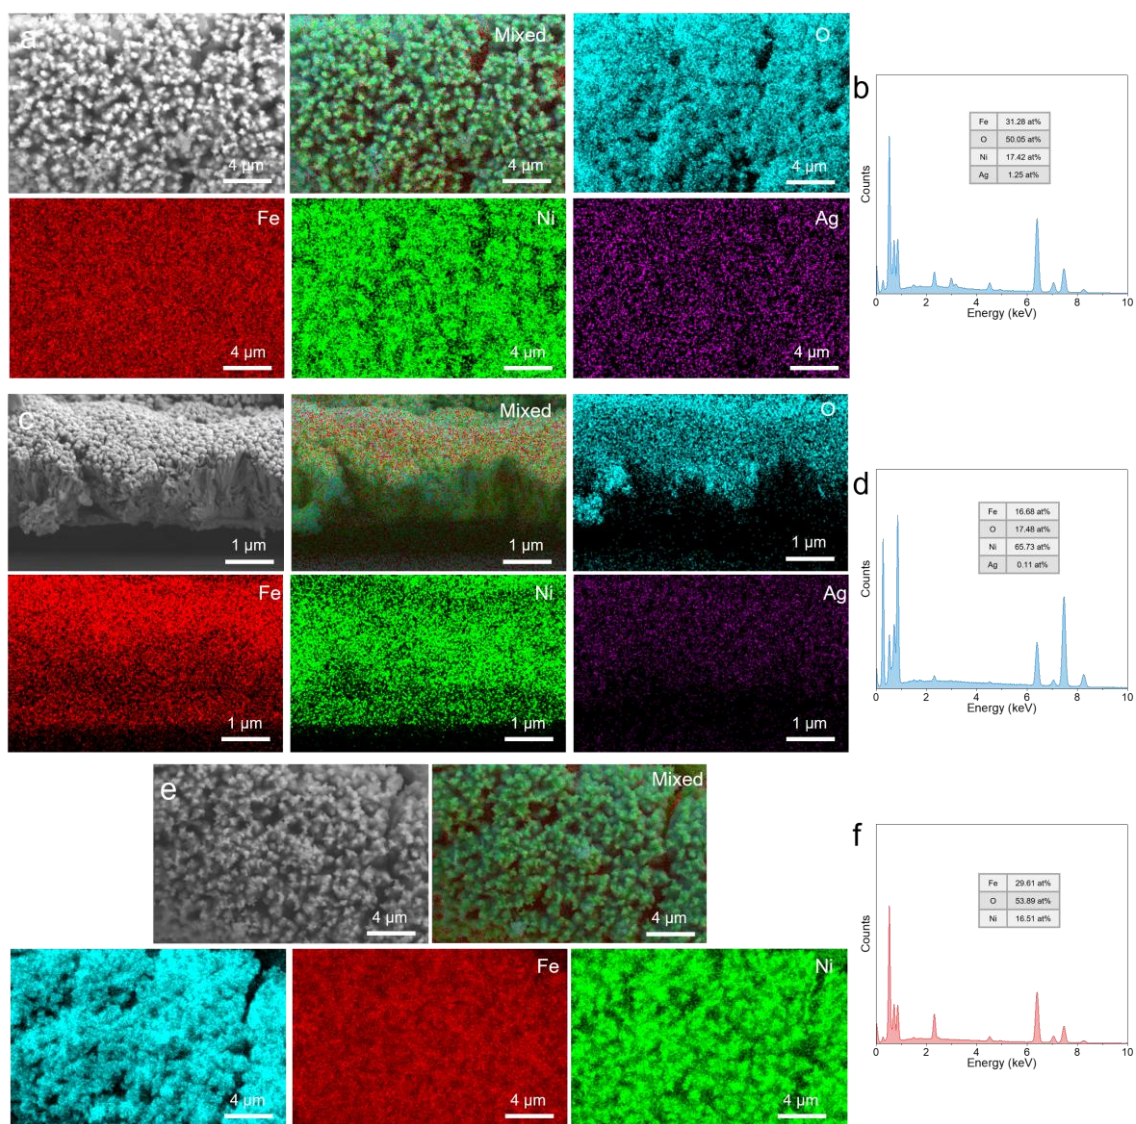

1  
 2 Supplementary Fig. 13 SEM-EDS elemental mapping of (a) FeO<sub>x</sub>/Ni-Ag, (c) cross-sectional FeO<sub>x</sub>/Ni-Ag,  
 3 and (e) FeO<sub>x</sub>/Ni, and the corresponding elemental spectra are presented in (b), (d), and (f), respectively.  
 4

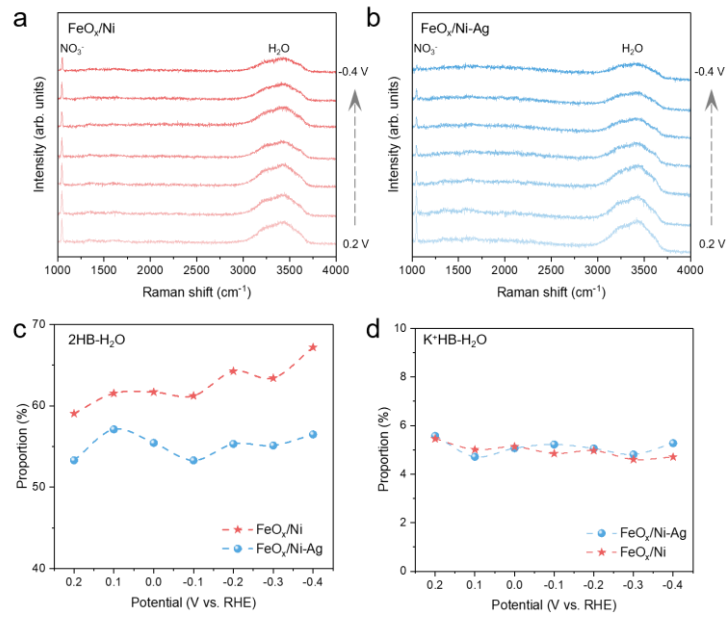

1  
 2 Supplementary Fig. 14 (a,b) *In-situ* Raman spectra of FeO<sub>x</sub>/Ni-Ag and FeO<sub>x</sub>/Ni during NO<sub>3</sub>RR. (c,d)  
 3 Comparison of interfacial water species ratios extracted from Raman analysis for FeO<sub>x</sub>/Ni-Ag and FeO<sub>x</sub>/Ni.

4

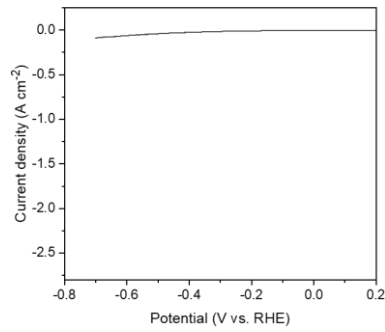

5  
 6 Supplementary Fig. 15 LSV curve of CP during NO<sub>3</sub>RR.

7

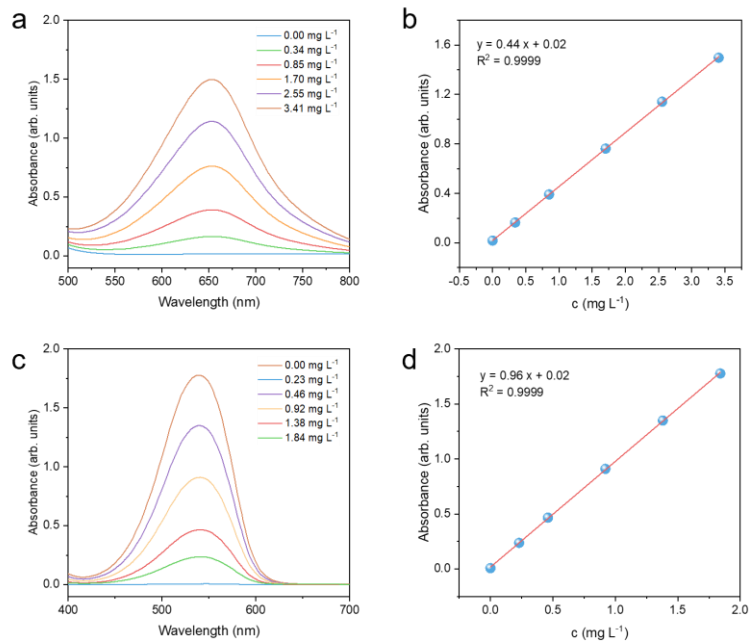

1  
 2 Supplementary Fig. 16 (a) UV-vis spectra and (b) calibration curves of standard solutions for NH<sub>3</sub>  
 3 quantification using colorimetric analysis. (c) UV-vis spectra and (d) calibration curves of standard solutions  
 4 for NO<sub>2</sub><sup>-</sup> quantification.

5

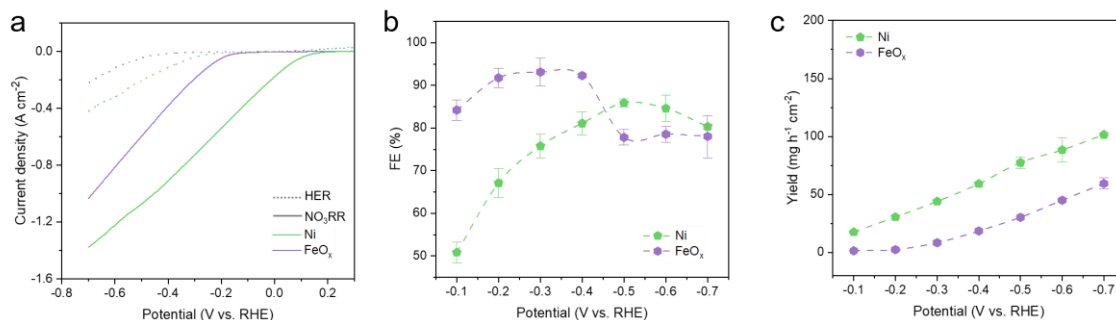

6  
 7 Supplementary Fig. 17 NO<sub>3</sub>RR performance of FeO<sub>x</sub> and Ni catalysts: (a) LSV curves; (b) FE of NH<sub>3</sub> at  
 8 various applied potentials; (c) Comparison of NH<sub>3</sub> yield rates under corresponding potentials.

9

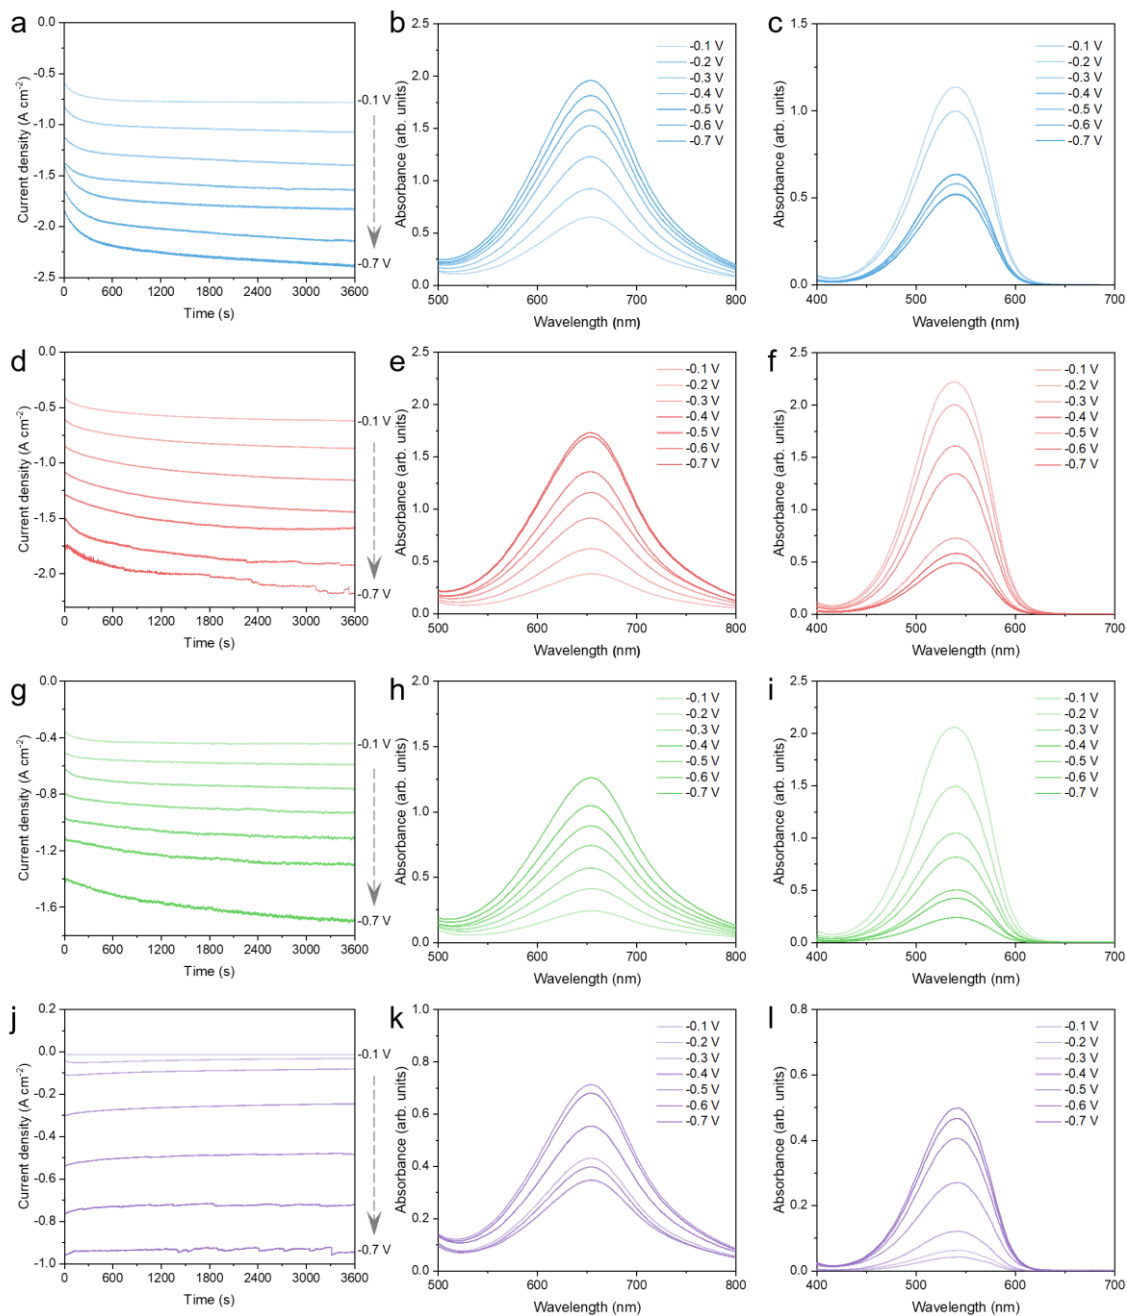

1  
 2 Supplementary Fig. 18 Data used for calculating  $\text{NH}_3$  FE and yield. (a) I-t curves, (b) UV-vis absorption  
 3 spectra of  $\text{NH}_3$ , and (c) UV-vis absorption spectra of  $\text{NO}_2^-$  for  $\text{FeO}_x/\text{Ni-Ag}$ . (d) I-t curves, (e) UV-vis  
 4 absorption spectra of  $\text{NH}_3$ , and (f) UV-vis absorption spectra of  $\text{NO}_2^-$  for  $\text{FeO}_x/\text{Ni}$ . (g) I-t curves, (h) UV-vis  
 5 absorption spectra of  $\text{NH}_3$  absorption spectrum, and (i) UV-vis absorption spectra of  $\text{NO}_2^-$  for  $\text{FeO}_x$ . (j) I-t  
 6 curves, (k) UV-vis absorption spectra of  $\text{NH}_3$ , and (l) UV-vis absorption spectra of  $\text{NO}_2^-$  for Ni catalyst.

7

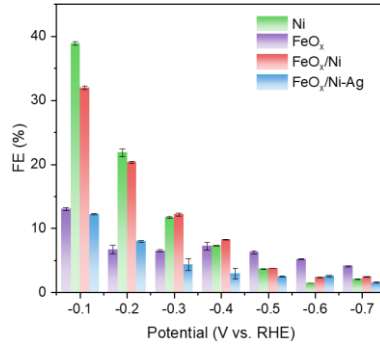

1  
2  
3

Supplementary Fig. 19 FE of  $\text{NO}_2^-$  for the synthesized catalysts at different applied potentials.

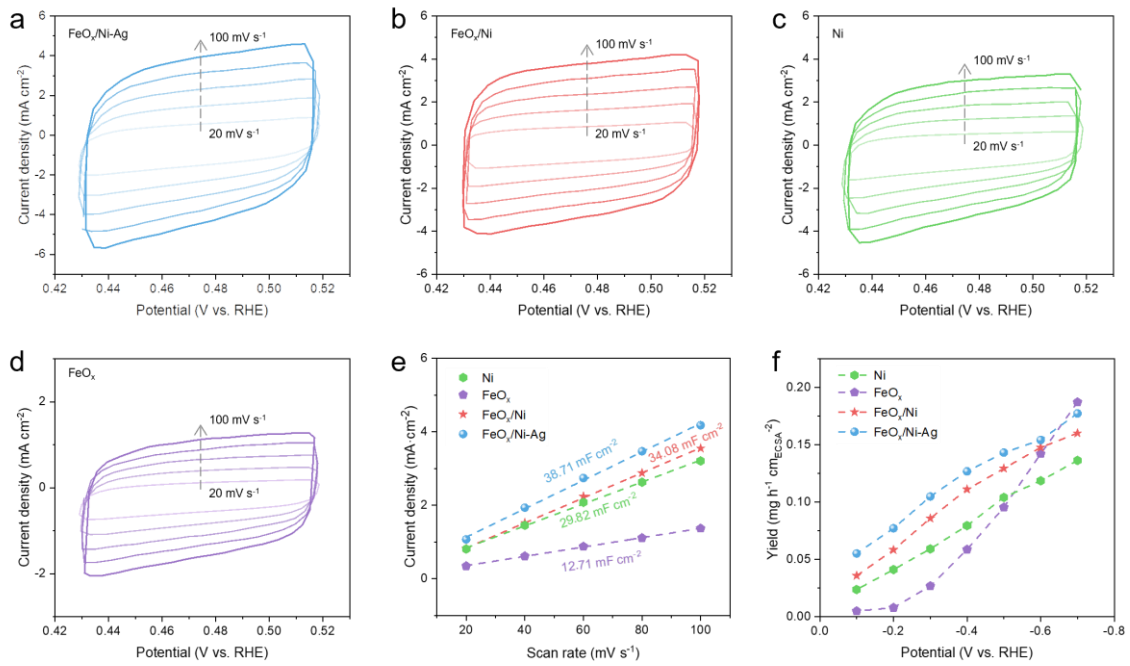

4  
5  
6  
7  
8

Supplementary Fig. 20 CV measurements for  $\text{NO}_3\text{RR}$  at different scan rates for (a)  $\text{FeO}_x/\text{Ni-Ag}$ , (b)  $\text{FeO}_x/\text{Ni}$ , (c)  $\text{Ni}$ , and (d)  $\text{FeO}_x$  catalysts. (e) Linear relationship between current density difference and scan rate. (f)  $\text{NH}_3$  yield rates normalized to ECSA at different applied potentials.

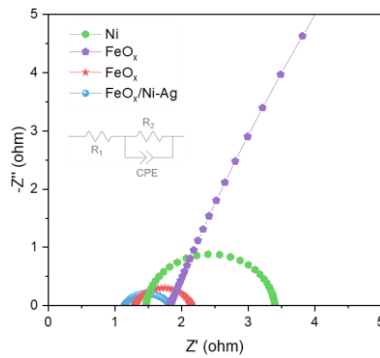

9

10 Supplementary Fig. 21 EIS fitting curves of  $\text{FeO}_x/\text{Ni-Ag}$ ,  $\text{FeO}_x/\text{Ni}$ ,  $\text{FeO}_x$ , and  $\text{Ni}$  catalysts.

1

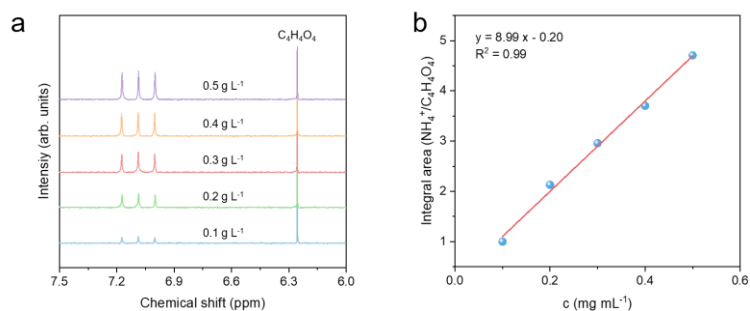

2

3 Supplementary Fig. 22 (a)  $^1\text{H}$  NMR spectra of standard  $\text{NH}_3$  solutions with varying concentrations and (b)  
4 the corresponding calibration curve.

5

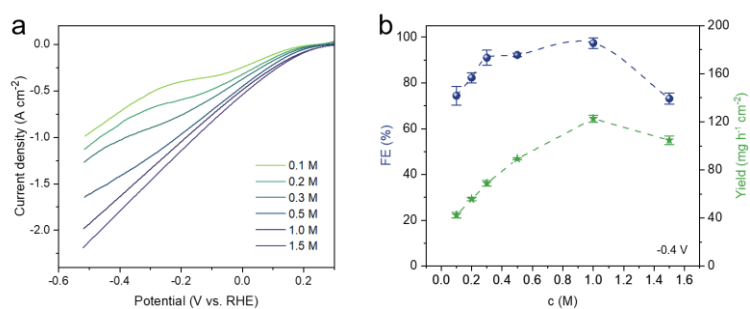

6

7 Supplementary Fig. 23  $\text{NO}_3\text{RR}$  performance of  $\text{FeO}_x/\text{Ni-Ag}$  under varying  $\text{NO}_3^-$  concentrations. (a) LSV  
8 curves. (b)  $\text{NH}_3$  FE and yield rate at  $-0.4\text{ V}$  (vs. RHE).

9

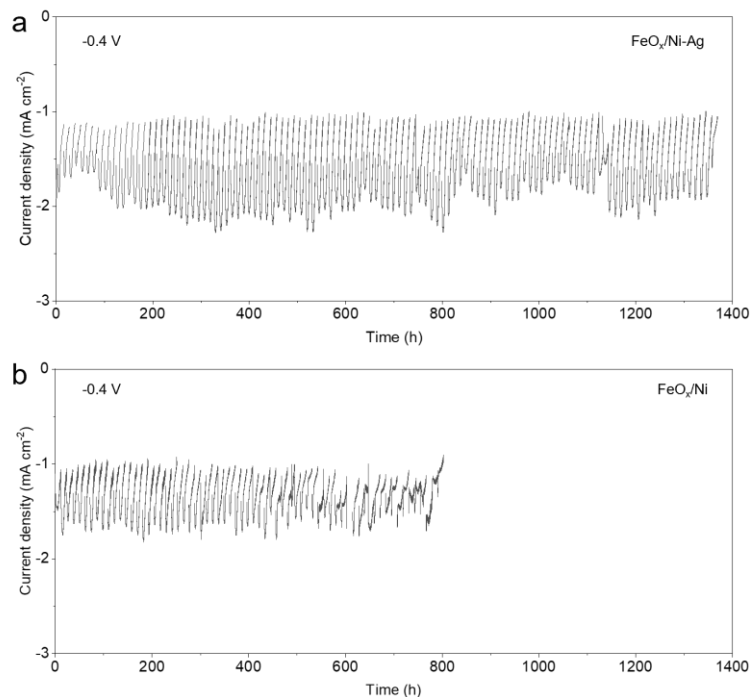

10

11 Supplementary Fig. 24 I-t curves of (a)  $\text{FeO}_x/\text{Ni-Ag}$  and (b)  $\text{FeO}_x/\text{Ni}$  during  $\text{NO}_3\text{RR}$  stability tests at  $-0.4\text{ V}$   
12 (vs. RHE).

1

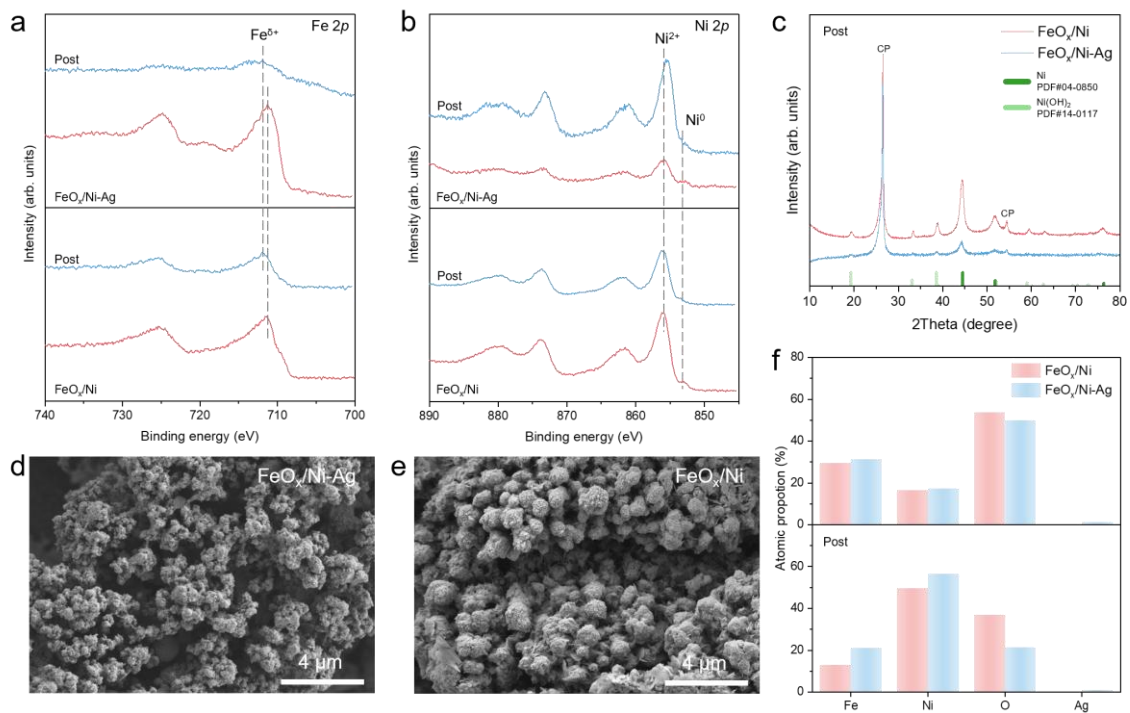

2

3 Supplementary Fig. 25 Post-mortem characterization after three-electrode NO<sub>3</sub>RR stability tests. a,b, High-  
 4 resolution Fe 2p (a) and Ni 2p (b) XPS spectra of FeO<sub>x</sub>/Ni-Ag and FeO<sub>x</sub>/Ni recorded before and after NO<sub>3</sub>RR  
 5 operation. c, XRD patterns of FeO<sub>x</sub>/Ni-Ag and FeO<sub>x</sub>/Ni after stability tests. d,e, SEM images of FeO<sub>x</sub>/Ni-Ag  
 6 (d) and FeO<sub>x</sub>/Ni (e) after prolonged NO<sub>3</sub>RR operation. f, Comparison of elemental compositions determined  
 7 by SEM-EDS before and after stability tests for FeO<sub>x</sub>/Ni-Ag and FeO<sub>x</sub>/Ni.

8

9

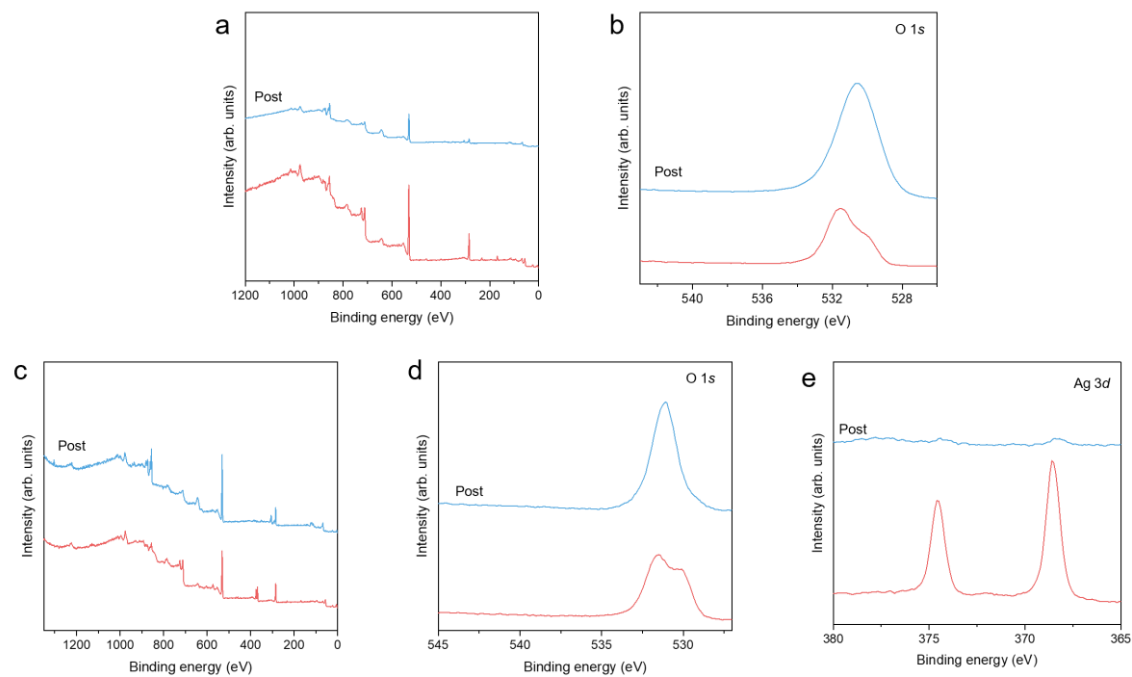

1  
 2 Supplementary Fig. 26 XPS comparison of catalysts before and after stability tests at -0.4 V. For FeO<sub>x</sub>/Ni:  
 3 (a) survey spectra, and (b) O 1s high-resolution spectra. For FeO<sub>x</sub>/Ni-Ag: (c) survey spectra, (d) O 1s and (e)  
 4 Ag 3d high-resolution spectra.

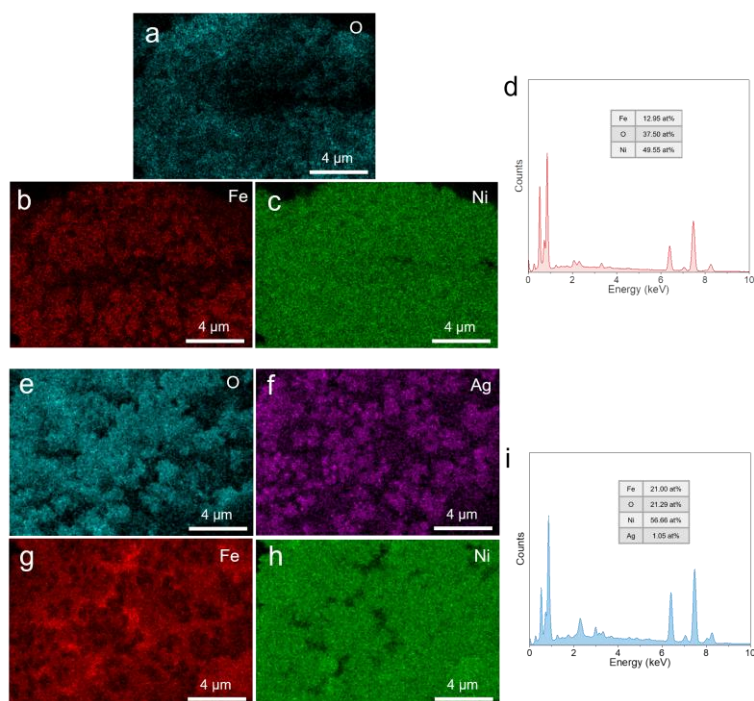

6  
 7 Supplementary Fig. 27 Post-stability characterization of catalysts in a three-electrode system. For FeO<sub>x</sub>/Ni:  
 8 (a-c) SEM-EDS elemental mappings, and (d) elemental composition spectrum. For FeO<sub>x</sub>/Ni-Ag: (e-h) SEM-  
 9 EDS elemental mappings, and (i) elemental composition spectrum.

10

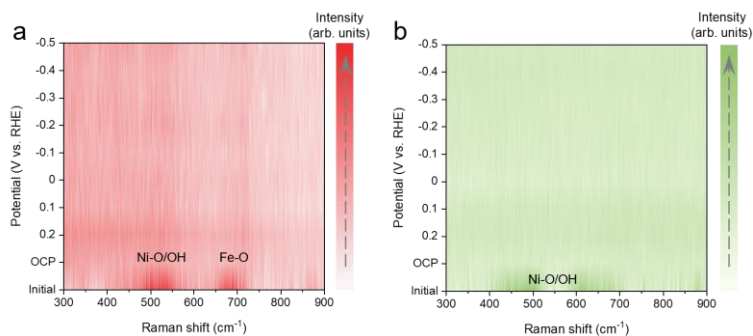

1  
 2 Supplementary Fig. 28 *In-situ* Raman spectra of (a) FeO<sub>x</sub>/Ni and (b) Ni catalysts recorded at different applied  
 3 potentials during NO<sub>3</sub>RR.  
 4

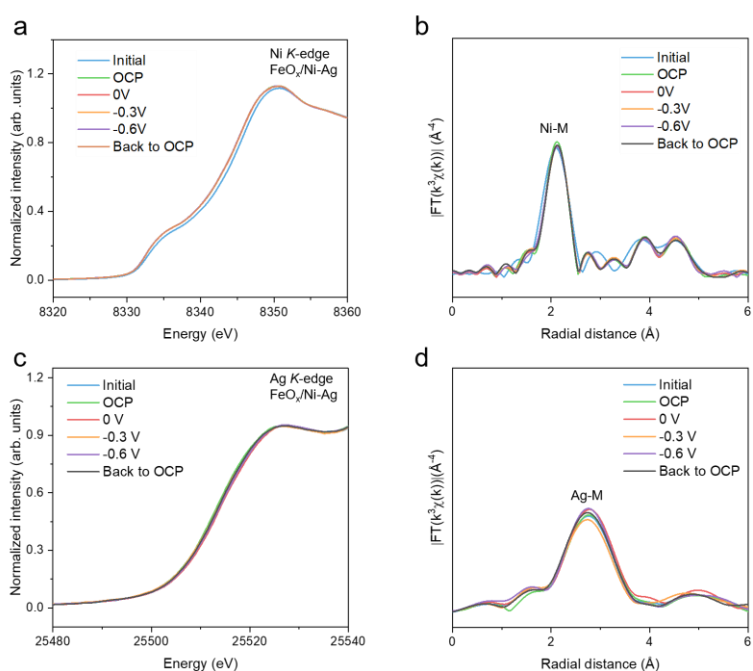

5  
 6 Supplementary Fig. 29 *Operando* XAS spectra of FeO<sub>x</sub>/Ni-Ag during NO<sub>3</sub>RR. (a) Ni K-edge XANES, (b)  
 7 Ni K-edge EXAFS, (c) Ag K-edge XANES, and (d) Ag K-edge EXAFS spectra acquired under NO<sub>3</sub>RR  
 8 conditions.  
 9  
 10  
 11

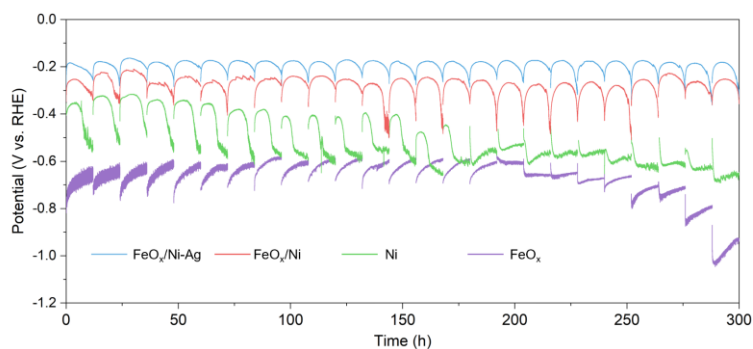

1  
2 Supplementary Fig. 30 Potential-time profiles of the synthesized catalysts during continuous NO<sub>3</sub>RR at 1 A  
3 cm<sup>-2</sup> for 300 h.

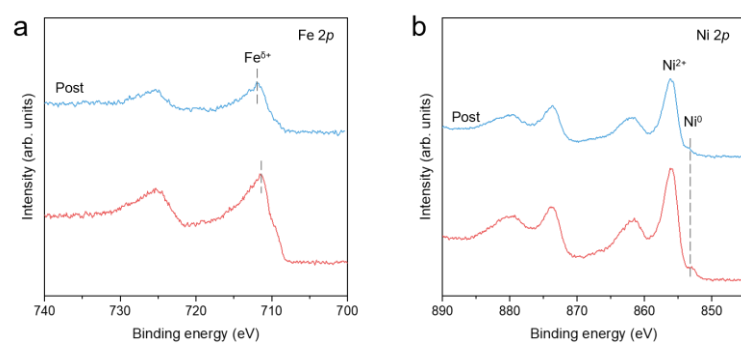

5  
6 Supplementary Fig. 31 High-resolution XPS spectra before and after 300 h continuous NO<sub>3</sub>RR at 1 A cm<sup>-2</sup>:  
7 (a) Fe 2*p* spectra of FeO<sub>x</sub>, and (b) Ni 2*p* spectra of Ni catalyst.

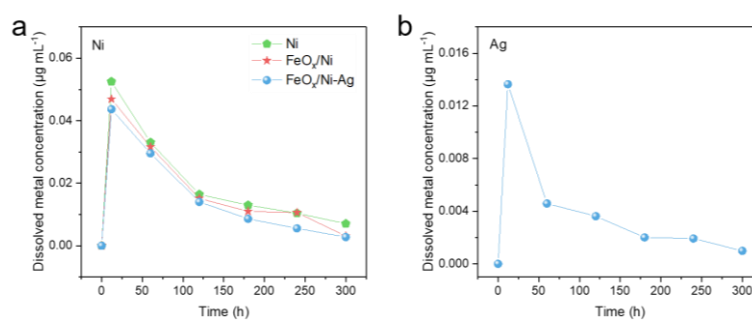

9  
10 Supplementary Fig. 32 (a) Ni dissolution behavior of Ni catalyst, FeO<sub>x</sub>/Ni and FeO<sub>x</sub>/Ni-Ag, and (b) Ag  
11 dissolution behavior of FeO<sub>x</sub>/Ni-Ag during continuous NO<sub>3</sub>RR at 1 A cm<sup>-2</sup>.

12

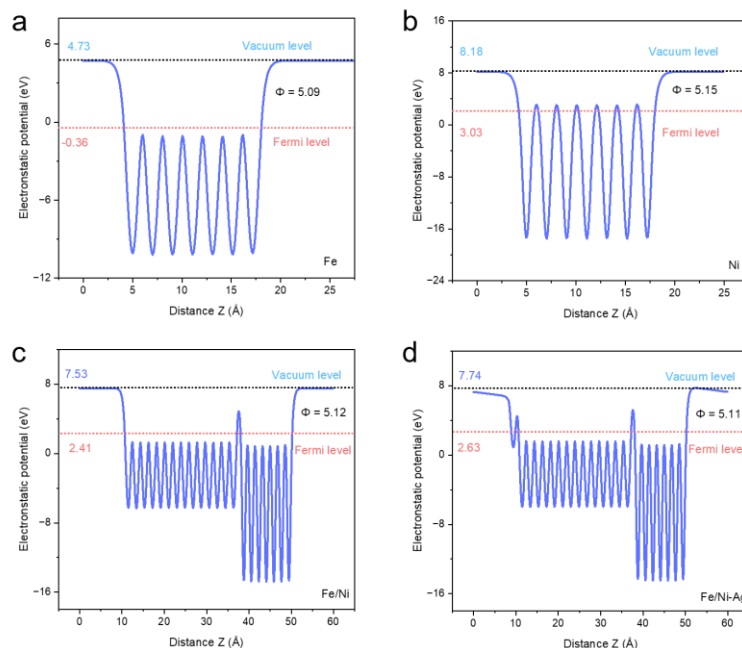

1  
2  
3

Supplementary Fig. 33 Work function calculations of (a) Fe, (b) Ni, (c) Fe/Ni, and Fe/Ni-Ag.

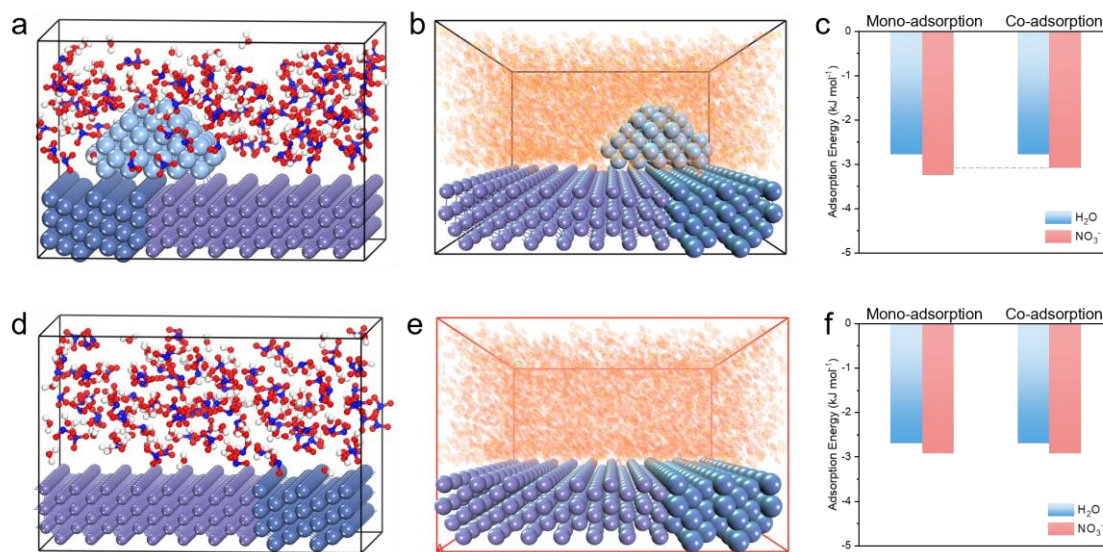

4  
5  
6  
7  
8  
9  
10

Supplementary Fig. 34 (a,b) Optimized adsorption configurations of H<sub>2</sub>O and NO<sub>3</sub><sup>-</sup> on Fe/Ni-Ag. (c) Comparison of adsorption energies of H<sub>2</sub>O and NO<sub>3</sub><sup>-</sup> on FeO<sub>x</sub>/Ni-Ag under individual and co-adsorption configurations, calculated based on the models shown in (b). (d,e) Adsorption configurations of H<sub>2</sub>O and NO<sub>3</sub><sup>-</sup> on Fe/Ni. (f) Comparison of adsorption energies H<sub>2</sub>O and NO<sub>3</sub><sup>-</sup> on Fe/Ni under individual and co-adsorption configurations, calculated based on the models shown in (e).

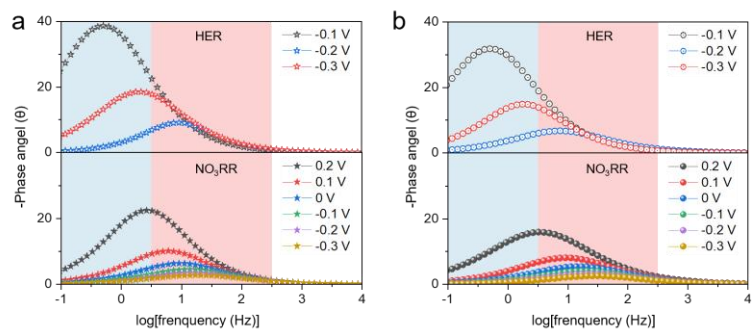

1

2 Supplementary Fig. 35 *In-situ* EIS Bode plots of (a) FeO<sub>x</sub>/Ni and (b) FeO<sub>x</sub>/Ni-Ag during HER and NO<sub>3</sub>RR  
 3 at different applied potentials.

4

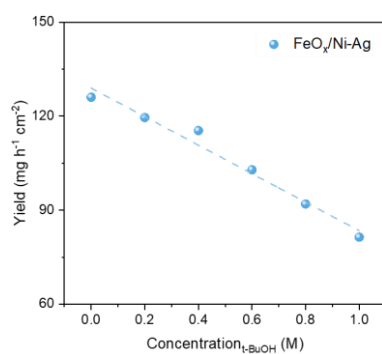

5

6 Supplementary Fig. 36 Effect of t-BuOH concentration on NH<sub>3</sub> production at -0.4 V (vs. RHE).

7

8

9

10

11

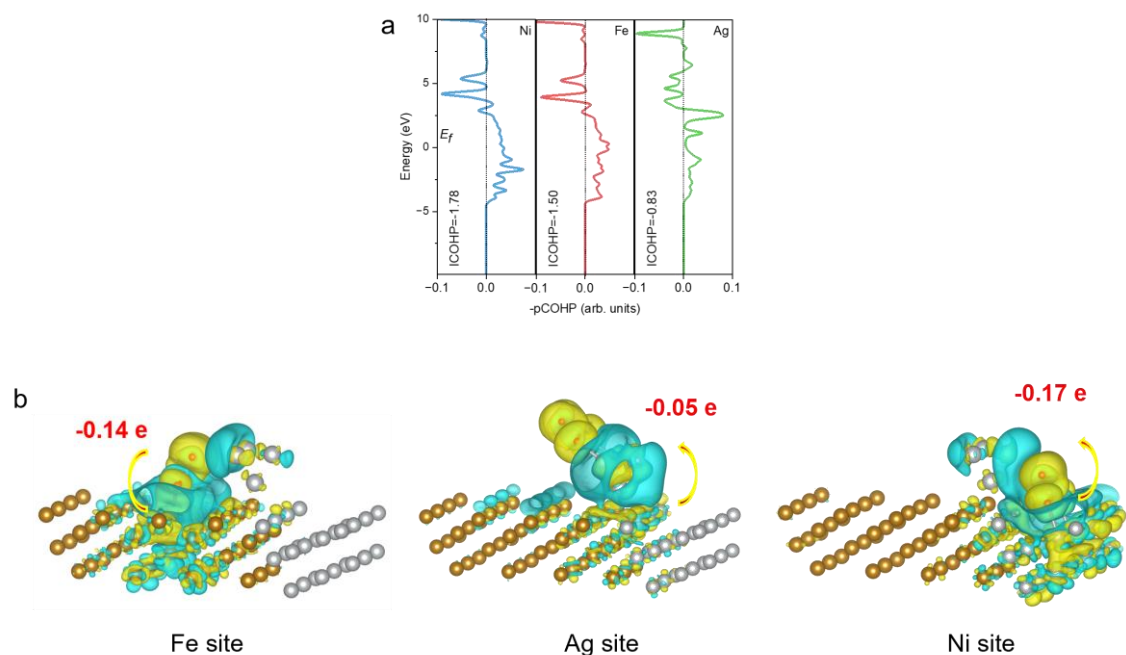

1  
2  
3  
4  
5

Supplementary Fig. 37 (a) pCOHP profiles showing  $\text{NO}_3^-$  adsorption on distinct interfacial sites of  $\text{FeO}_x/\text{Ni-Ag}$ . (b) Charge density difference of  $\text{NO}_3^-$  adsorption on different metal sites in  $\text{FeO}_x/\text{Ni-Ag}$ , where yellow and cyan denote electron accumulation and depletion.

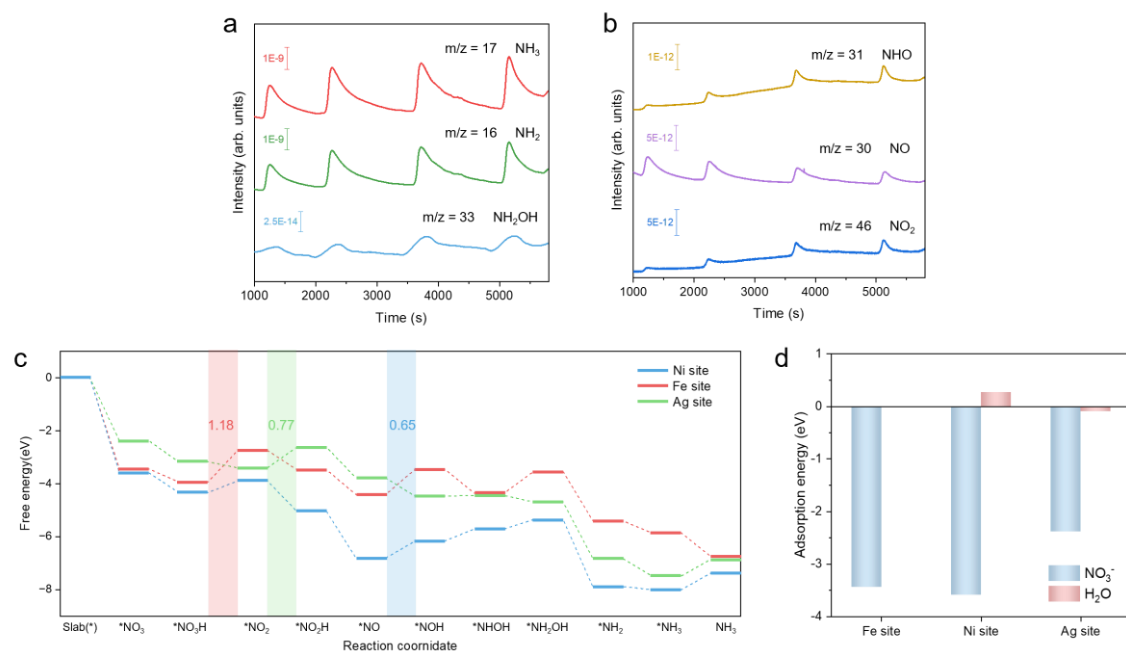

6  
7  
8  
9  
10

Supplementary Fig. 38 (a,b) Online DEMS spectra recorded for  $\text{FeO}_x/\text{Ni-Ag}$  during  $\text{NO}_3\text{RR}$ . (c) DFT calculated energy profiles for  $\text{NO}_3\text{RR}$  at different active sites of  $\text{FeO}_x/\text{Ni-Ag}$ . (d) Adsorption energies of  $\text{NO}_3^-$  and  $\text{H}_2\text{O}$  at different active sites of  $\text{FeO}_x/\text{Ni-Ag}$ .

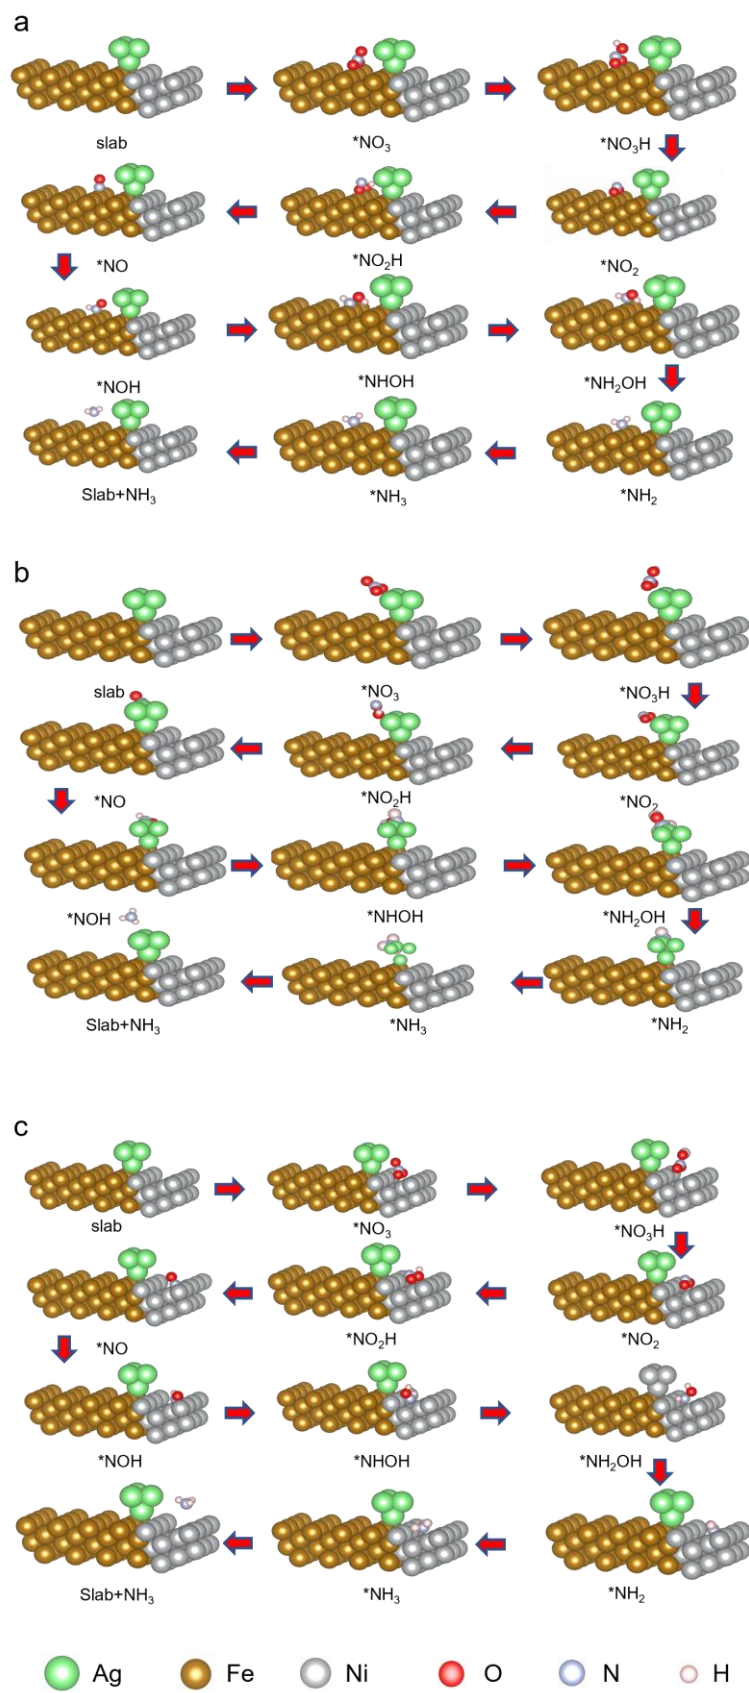

1

2 Supplementary Fig. 39 Adsorption configurations of  $\text{NO}_3\text{RR}$  intermediates on  $\text{FeO}_x/\text{Ni-Ag}$  at (a) Fe, (b) Ag,  
 3 and (c) Ni sites.

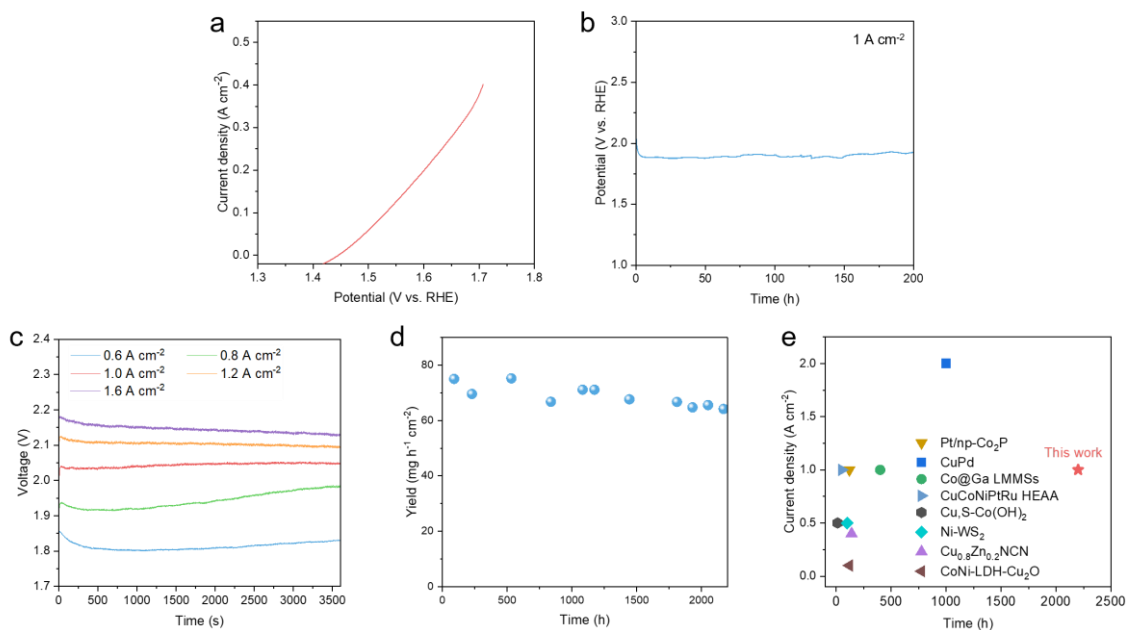

1  
 2 Supplementary Fig. 40 Electrochemical OER and MEA performance of FeO<sub>x</sub>/Ni-Ag. a,b, OER  
 3 measurements in a three-electrode configuration: (a) LSV curves and (b) potential-time response at 1 A cm<sup>-2</sup>. c-e, MEA performance using FeO<sub>x</sub>/Ni-Ag as both cathode and anode: (c) voltage-time curves at various  
 4 current densities; and (d) NH<sub>3</sub> yield rate during long-term operation. (e) Comparison of MEA NO<sub>3</sub>RR  
 5 performance for reported catalysts.  
 6

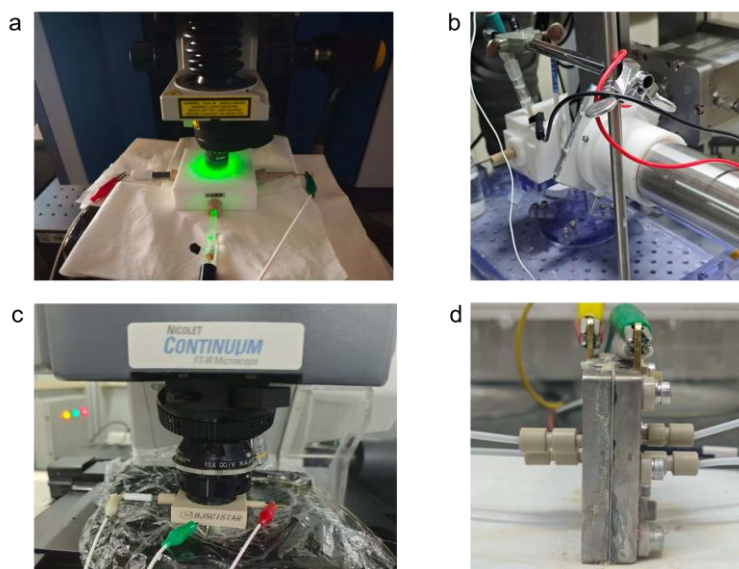

8  
 9 Supplementary Fig. 41 Photographs of experimental setups for (a) *In-situ* Raman, (b) *operando* XAS, (c) *In-*  
 10 *situ* SR-FTIR measurements, and (d) MEA system.  
 11

1 Supplementary Table 1 Descriptors included in the Pearson correlation analysis.

| Category            | Property                | Abbreviation         |
|---------------------|-------------------------|----------------------|
| Periodic properties | Atomic radius           | r                    |
|                     | Atomic number           | N                    |
|                     | Atomic mass             | m                    |
|                     | Period number           | N <sub>p</sub>       |
|                     | Electronegativity       | $\chi$               |
| Crystallographic    | Lattice constant        | a                    |
|                     | Single atomic energy    | E <sub>atom</sub>    |
|                     | Binding energy          | E <sub>binding</sub> |
|                     | Valence electron number | V <sub>E</sub>       |
|                     | Electron affinity       | E <sub>aff</sub>     |
| Reactive properties | Bond length to H        | R <sub>TM-H</sub>    |
|                     | Adsorption energy to H  | G <sub>ads-H</sub>   |
|                     | Bond length to OH       | R <sub>TM-OH</sub>   |
|                     | Adsorption energy to OH | G <sub>ads-OH</sub>  |
|                     | d-band center           | $\epsilon_d$         |
|                     | COHP                    | ICOHP                |

2

3 Supplementary Table 2 Atomic ratios of different elements in FeO<sub>x</sub>/Ni-Ag determined by ICP-OES.

| Fe       | Ni        | Ag       |
|----------|-----------|----------|
| 8.41 at% | 24.29 at% | 0.20 at% |

4

5 Supplementary Table 3 Performance comparison between FeO<sub>x</sub>/Ni-Ag and recently reported advanced  
6 NO<sub>3</sub>RR catalysts.

| Catalyst                                                       | Electrolyte                      | FE <sub>max</sub><br>(%) | Yield <sub>max</sub> (FE>90%)<br>(mg h <sup>-1</sup> cm <sup>-2</sup> ) | Stability<br>(h) | References |
|----------------------------------------------------------------|----------------------------------|--------------------------|-------------------------------------------------------------------------|------------------|------------|
| FeO <sub>x</sub> /Ni-Ag                                        | 1 M KOH + 1 M KNO <sub>3</sub>   | 97.43                    | 149.24                                                                  | 1357             | This work  |
| Pd1/CuS                                                        | 1 M KOH + 0.5 M KNO <sub>3</sub> | ~100                     | 17.22                                                                   | 90               | Ref. 27    |
| La-CuOx                                                        | 1 M KOH + 1 M KNO <sub>3</sub>   | 99.74                    | 140                                                                     | 10               | Ref. 28    |
| Co@Ga LMMSs                                                    | 1 M NaOH + 1 M NaNO <sub>3</sub> | 99.59                    | 12.17                                                                   | 400              | Ref. 29    |
| PCN-Cu-DAC                                                     | 1 M KOH + 1 M KNO <sub>3</sub>   | 97.5                     | 25.80                                                                   | 360              | Ref. 30    |
| Ov-Co(OH) <sub>2</sub> /Cu                                     | 1 M KOH + 0.5 M KNO <sub>3</sub> | 97.                      | 167.8                                                                   | 25               | Ref. 31    |
| <i>p</i> -CN-Cu <sup>9</sup> La <sup><i>n</i></sup> - <i>m</i> | 1 M KOH + 0.5 M KNO <sub>3</sub> | 97.7                     | 37.55                                                                   | 110              | Ref. 32    |
| NiMnCoAg-BHT                                                   | 1 M KOH + 1 M KNO <sub>3</sub>   | 98                       | 36.23                                                                   | 10               | Ref. 33    |

|                                        |                                   |       |        |    |         |
|----------------------------------------|-----------------------------------|-------|--------|----|---------|
| 4H/fcc Au-Cu                           | 1 M KOH + 1 M KNO <sub>3</sub>    | 98.9  | 116.2  | 16 | Ref. 34 |
| Co <sub>3</sub> O <sub>4</sub> /Cu-N-C | 1 M KOH + 1 M KNO <sub>3</sub>    | 97.7  | 109.84 | 20 | Ref. 35 |
| SD-Fe1-Ti                              | 1 M KOH + 1 M KNO <sub>3</sub>    | 95.2  | 68.12  | 20 | Ref. 36 |
| NiCoP                                  | 1 M KOH + 1 M KNO <sub>3</sub>    | 99.7  | 110.37 | 24 | Ref. 37 |
| Cu <sub>1</sub> Co <sub>1</sub> -HDS   | 1 M KOH + 0.5 M KNO <sub>3</sub>  | 96.15 | 78.78  | 20 | Ref. 38 |
| Cu <sub>1</sub> Co <sub>5</sub>        | 1 M KOH + 1 M KNO <sub>3</sub>    | 96.2  | 32.4   | 30 | Ref. 39 |
| CuPc MDE                               | 1 M KOH + 1 M KNO <sub>3</sub>    | 98.4  | 62.4   | 30 | Ref. 40 |
| CuNi NPs                               | 1 M KOH + 0.71 M KNO <sub>3</sub> | 97.03 | 94.57  | 12 | Ref. 41 |

1

2 Supplementary Table 4 MEA performance comparison between FeO<sub>x</sub>/Ni-Ag and recently reported advanced  
3 NO<sub>3</sub>RR catalysts.

| Catalyst                                | Electrolyte                         | Voltage in<br>1 A cm <sup>-2</sup><br>(V) | FE in 1 A cm <sup>-2</sup><br>(%) | Current density<br>for stability test<br>(A cm <sup>-2</sup> ) | Durability<br>(h) | References |
|-----------------------------------------|-------------------------------------|-------------------------------------------|-----------------------------------|----------------------------------------------------------------|-------------------|------------|
| FeO <sub>x</sub> /Ni-Ag                 | 1 M KOH +<br>1 M KNO <sub>3</sub>   | 2.04                                      | 90.5                              | 1                                                              | 2200              | This work  |
| Pt/np-Co <sub>2</sub> P                 | 1 M KOH +<br>1 M KNO <sub>3</sub>   | 2.15                                      | 96.6                              | 1                                                              | 120               | Ref. 42    |
| CuPd                                    | 1 M KOH +<br>1 M KNO <sub>3</sub>   | 2.21                                      | 80.4                              | 2                                                              | 1000              | Ref. 43    |
| Co@Ga LMMSs                             | 1 M NaOH +<br>1 M NaNO <sub>3</sub> | 2.20                                      | 90.0                              | 1                                                              | 400               | Ref. 29    |
| CuCoNiPtRu<br>HEAA                      | 1 M KOH +<br>0.5 M KNO <sub>3</sub> | 2.20                                      | 93.8                              | 1                                                              | 50                | Ref. 44    |
| Cu <sub>1</sub> S-Co(OH) <sub>2</sub>   | 1 M KOH +<br>0.1 M KNO <sub>3</sub> | 2.10                                      | 81.3                              | 0.5                                                            | 12                | Ref. 45    |
| Ni-WS <sub>2</sub>                      | 1 M KOH +<br>0.1 M KNO <sub>3</sub> | /                                         | /                                 | 0.5                                                            | 100               | Ref. 46    |
| Cu <sub>0.8</sub> Zn <sub>0.2</sub> NCN | 1 M KOH +<br>0.5 M KNO <sub>2</sub> | 2.30                                      | 67.71                             | 0.4                                                            | 140               | Ref. 47    |
| CoNi-LDH-Cu <sub>2</sub> O              | 1 M KOH +<br>0.1 M KNO <sub>3</sub> | /                                         | /                                 | 0.1                                                            | 120               | Ref. 48    |

4

5

## 1 Reference

- 2 1. Kresse, G. & Hafner, J. Ab initio molecular dynamics for liquid metals. *Phys. Rev. B* **47**, 558-561 (1993).
- 3 2. Kresse, G. & Furthmüller, J. Efficiency of ab-initio total energy calculations for metals and  
4 semiconductors using a plane-wave basis set. *Comp. Mater. Sci.* **6**, 15-50 (1996).
- 5 3. Blöchl, P.E. Projector augmented-wave method. *Phys. Rev. B* **50**, 17953-17979 (1994).
- 6 4. Kresse, G. & Joubert, D. From ultrasoft pseudopotentials to the projector augmented-wave method. *Phys.*  
7 *Rev. B* **59**, 1758-1775 (1999).
- 8 5. Perdew, J.P., Burke, K. & Ernzerhof, M. Generalized Gradient Approximation Made Simple. *Phys. Rev.*  
9 *Lett.* **77**, 3865-3868 (1996).
- 10 6. Kresse, G. & Furthmüller, J. Efficient iterative schemes for ab initio total-energy calculations using a  
11 plane-wave basis set. *Phys. Rev. B* **54**, 11169-11186 (1996).
- 12 7. Monkhorst, H.J. & Pack, J.D. Special points for Brillouin-zone integrations. *Phys. Rev. B* **13**, 5188-5192  
13 (1976).
- 14 8. Grimme, S. Semiempirical GGA-type density functional constructed with a long-range dispersion  
15 correction. *J. Comput. Chem.* **27**, 1787-1799 (2006).
- 16 9. Mathew, K., Sundararaman, R., Letchworth-Weaver, K., Arias, T.A. & Hennig, R.G. Implicit solvation  
17 model for density-functional study of nanocrystal surfaces and reaction pathways. *J. Chem. Phys.* **140**,  
18 084106 (2014).
- 19 10. Henkelman, G., Arnaldsson, A. & Jónsson, H. A fast and robust algorithm for Bader decomposition of  
20 charge density. *Comp. Mater. Sci.* **36**, 354-360 (2006).
- 21 11. Bader, R.F.W. A quantum theory of molecular structure and its applications. *Chem. Rev.* **91**, 893-928  
22 (1991).
- 23 12. Dronskowski, R. & Bloechl, P.E. Crystal orbital Hamilton populations (COHP): energy-resolved  
24 visualization of chemical bonding in solids based on density-functional calculations. *J. Phys. Chem.* **97**,  
25 8617-8624 (1993).
- 26 13. Maintz, S., Deringer, V.L., Tchougréeff, A.L. & Dronskowski, R. LOBSTER: A tool to extract chemical  
27 bonding from plane-wave based DFT. *J. Comput. Chem.* **37**, 1030-1035 (2016).
- 28 14. Nosé, S. A unified formulation of the constant temperature molecular dynamics methods. *J. Chem. Phys.*  
29 **81**, 511-519 (1984).
- 30 15. Zhao, X. & Liu, Y. Origin of Selective Production of Hydrogen Peroxide by Electrochemical Oxygen  
31 Reduction. *J. Am. Chem. Soc.* **143**, 9423-9428 (2021).
- 32 16. Nørskov, J.K. et al. Trends in the Exchange Current for Hydrogen Evolution. *J. Electrochem. Soc.* **152**,  
33 J23 (2005).
- 34 17. Shi, X. et al. Revealing and modulating catalyst reconstruction for highly efficient electrosynthesis of  
35 ammonia. *Nat. Commun.* **16**, 6161 (2025).
- 36 18. Ly, A., Marsman, M. & Wagenmakers, E.-J. Analytic posteriors for Pearson's correlation coefficient. *Stat.*  
37 *Neerl.* **72**, 4-13 (2018).
- 38 19. Hao, J. & Ho, T.K. Machine Learning Made Easy: A Review of Scikit-learn Package in Python  
39 Programming Language. *J. Edu. Behav. Stat.* **44**, 348-361 (2019).
- 40 20. Jerome, H.F. Greedy function approximation: A gradient boosting machine. *Ann. Stat.* **29**, 1189-1232  
41 (2001).
- 42 21. Belgiu, M. & Drăguț, L. Random forest in remote sensing: A review of applications and future directions.  
43 *ISPRS J. Photogram. Remote Sens.* **114**, 24-31 (2016).
- 44 22. Peterson, L.E. K-nearest neighbor. *Scholarpedia* **4**, 1883 (2009).

- 1 23. Dey, P., Nag, K., Pal, T. & Pal, N.R. Regularizing Multilayer Perceptron for Robustness. *IEEE Trans.*  
2 *Sys. Man Cybern. Syst.* **48**, 1255-1266 (2018).
- 3 24. Ding, Y., Tong, L., Liu, X., Liu, Y. & Zhao, Y. Artificial Intelligence-Driven Innovations in Hydrogen  
4 Storage Technology. *Energy Environ. Mater.* **8** (2025).
- 5 25. Ouyang, R., Curtarolo, S., Ahmetcik, E., Scheffler, M. & Ghiringhelli, L.M. SISO: A compressed-  
6 sensing method for identifying the best low-dimensional descriptor in an immensity of offered candidates.  
7 *Phys. Rev. Mater.* **2**, 083802 (2018).
- 8 26. Purcell, T.A.R., Scheffler, M. & Ghiringhelli, L.M. Recent advances in the SISO method and their  
9 implementation in the SISO++ code. *J. Chem. Phys.* **159**, 114110 (2023).
- 10 27. He, Q. et al. Dynamic Reconstruction and Microenvironment Modulation of a Pd-Doped CuS  
11 Electrocatalyst for Nearly Unity-Efficiency Ammonia Electrosynthesis from Nitrate. *J. Am. Chem. Soc.*  
12 **147**, 43067-43076 (2025).
- 13 28. Zhang, S. et al. Artificial Frustrated Lewis Pairs for Ampere-Level Ammonia Synthesis and High-Power-  
14 Density Zinc-Nitrate Battery. *J. Am. Chem. Soc.* **147**, 41433-41442 (2025).
- 15 29. Chen, W. et al. Liquid Metal Dynamic Interface Enabled Reverse Hydrogen Spillover Boosting  
16 Electrocatalytic Nitrate Reduction. *Angew. Chem. Int. Ed.* **65**, e202516997 (2026).
- 17 30. Li, Q., Li, Y., Xu, B., Yang, J. & Wang, Y. Gram-Scale Ammonia Synthesis via Electrochemical Nitrate  
18 Reduction Using Enzyme-Inspired Dual-Atomic Cu Catalyst. *Angew. Chem. Int. Ed.* **64**, e202510139  
19 (2025).
- 20 31. Mei, W. et al. Robust Oxygen-Vacancy-Engineered  $\text{Co}(\text{OH})_2/\text{Cu}$  Heterostructures Boost Nitrate  
21 Electroreduction to Ammonia beyond  $2 \text{ A cm}^{-2}$ . *Adv. Mater.* **37**, 2507363 (2025).
- 22 32. Zuo, Y. et al. Capturing Copper Single Atom in Proton Donor Stimulated O-End Nitrate Reduction. *Adv.*  
23 *Mater.* **37**, 2415632 (2025).
- 24 33. Namvar, S. et al. 2D Multivariate-Metal-Organic Frameworks (2D-M<sup>2</sup>OF) for High Yield Ammonia  
25 Synthesis from Nitrate. *Adv. Energy Mater.* **15**, 2405031 (2025).
- 26 34. Ma, Y. et al. Unconventional phase metal heteronanostructures with tunable exposed interface for  
27 efficient tandem nitrate electroreduction to ammonia. *Nat. Commun.* **16**, 7632 (2025).
- 28 35. Liu, Y. et al. Efficient tandem electroreduction of nitrate into ammonia through coupling Cu single atoms  
29 with adjacent  $\text{Co}_3\text{O}_4$ . *Nat. Commun.* **15**, 3619 (2024).
- 30 36. Dai, J. et al. Spin polarized  $\text{Fe}_1\text{-Ti}$  pairs for highly efficient electroreduction nitrate to ammonia. *Nat.*  
31 *Commun.* **15**, 88 (2024).
- 32 37. Li, Y. et al. Improved Nitrate-to-Ammonia Electrocatalysis through Hydrogen Poisoning Effects. *Angew.*  
33 *Chem. Int. Ed.* **63**, e202411068 (2024).
- 34 38. Jang, W. et al. Homogeneously Mixed Cu-Co Bimetallic Catalyst Derived from Hydroxy Double Salt for  
35 Industrial-Level High-Rate Nitrate-to-Ammonia Electrosynthesis. *J. Am. Chem. Soc.* **146**, 27417-27428  
36 (2024).
- 37 39. Zhou, Y. et al. Boosting Electrocatalytic Nitrate Reduction to Ammonia via Promoting Water  
38 Dissociation. *ACS Catal.* **13**, 10846-10854 (2023).
- 39 40. Jiang, Z. et al. Molecular electrocatalysts for rapid and selective reduction of nitrogenous waste to  
40 ammonia. *Energy Environ. Sci.* **16**, 2239-2246 (2023).
- 41 41. Yu, W. et al. Laser-controlled tandem catalytic sites of CuNi alloys with ampere-level electrocatalytic  
42 nitrate-to-ammonia reduction activities for Zn-nitrate batteries. *Energy Environ. Sci.* **16**, 2991-3001  
43 (2023).
- 44 42. Zhou, X. et al. Tuning Active Hydrogen via Spillover Enables the Wide-Potential Electrochemical

- 1 Reduction of Nitrate to Ammonia. *Adv. Mater.* e18272 (2025). <https://doi.org/10.1002/adma.202518272>
- 2 43. Fu, Y. et al. Copper-palladium hydride interfaces promote electrochemical ammonia synthesis. *Nat. Synth.*
- 3 (2025). <https://doi.org/10.1038/s44160-025-00941-1>
- 4 44. Li, S. et al. A Reaction-Diffusion-Coupled Strategy for Ampere-Level Electrocatalytic Nitrate Reduction
- 5 to Ammonia. *Nano Lett.* **25**, 14185-14194 (2025).
- 6 45. Yu, F. et al. Dual Ion Leaching-Induced Reconstruction of CuCo<sub>2</sub>S<sub>4</sub> Boosts Electrocatalytic Nitrate
- 7 Reduction to Ammonia with Favorable Active Hydrogen Coverage. *Adv. Energy Mater.* **15**, e03613
- 8 (2025).
- 9 46. Lv, J. et al. Accelerating Nitrate Electroreduction to Ammonia via Metal-Support Interactions in Ni-WS<sub>2</sub>
- 10 Catalysts. *J. Am. Chem. Soc.* **147**, 27708-27719 (2025).
- 11 47. Wang, J.J. et al. A Copper-Zinc Cyanamide Solid-Solution Catalyst with Tailored Surface Electrostatic
- 12 Potentials Promotes Asymmetric N-Intermediate Adsorption in Nitrite Electroreduction. *J. Am. Chem.*
- 13 *Soc.* **147**, 8012-8023 (2025).
- 14 48. Zheng, M., Wan, Y., Huang, Z.-H., Kang, F. & Lv, R. Interfacial Synergistic Hydrogen Spillover and
- 15 Electron Transfer for Boosting Electrocatalytic Nitrate Reduction to Ammonia. *Adv. Mater.* **38**, e14834
- 16 (2026).
